# Supplementary material for: Impact of structural ageism on greater violence against older persons: a cross-national study of 56 countries
Source: PubMed Central journal article supplement — BMJ Open. 2021 May 13;11(5):e042580. doi: 10.1136/bmjopen-2020-042580 (PMC8126306; doi:10.1136/bmjopen-2020-042580), 2021-05-13
Supplement: bmjopen-2020-042580.draft_revisions.pdf [file bmjopen-2020-042580.draft_revisions.pdf]

# BMJ Open

BMJ Open is committed to open peer review. As part of this commitment we make the peer review history of every article we publish publicly available.

When an article is published we post the peer reviewers' comments and the authors' responses online. We also post the versions of the paper that were used during peer review. These are the versions that the peer review comments apply to.

The versions of the paper that follow are the versions that were submitted during the peer review process. They are not the versions of record or the final published versions. They should not be cited or distributed as the published version of this manuscript.

BMJ Open is an open access journal and the full, final, typeset and author-corrected version of record of the manuscript is available on our site with no access controls, subscription charges or pay-per-view fees (<http://bmjopen.bmj.com>).

If you have any questions on BMJ Open's open peer review process please email [info.bmjopen@bmj.com](mailto:info.bmjopen@bmj.com)

# BMJ Open

## Structural Ageism Impact on Greater Violence Against Older Persons: A Global Analysis of 56 Countries

|                               |                                                                                                                                                                                                                                                                                                                                                                                    |
|-------------------------------|------------------------------------------------------------------------------------------------------------------------------------------------------------------------------------------------------------------------------------------------------------------------------------------------------------------------------------------------------------------------------------|
| Journal:                      | <i>BMJ Open</i>                                                                                                                                                                                                                                                                                                                                                                    |
| Manuscript ID                 | bmjopen-2020-042580                                                                                                                                                                                                                                                                                                                                                                |
| Article Type:                 | Original research                                                                                                                                                                                                                                                                                                                                                                  |
| Date Submitted by the Author: | 08-Jul-2020                                                                                                                                                                                                                                                                                                                                                                        |
| Complete List of Authors:     | Chang, E-Shien; Yale University School of Public Health, Social and Behavioral Sciences<br>Monin, Joan ; Yale University School of Public Health, Social and Behavioral Sciences<br>Zelterman, Daniel; Yale University School of Public Health, Biostatistics<br>Levy, Becca; Yale University School of Public Health, Social and Behavioral Sciences; Yale University, Psychology |
| Keywords:                     | GERIATRIC MEDICINE, PUBLIC HEALTH, SOCIAL MEDICINE                                                                                                                                                                                                                                                                                                                                 |
|                               |                                                                                                                                                                                                                                                                                                                                                                                    |

SCHOLARONE™  
Manuscripts

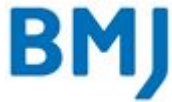

I, the Submitting Author has the right to grant and does grant on behalf of all authors of the Work (as defined in the below author licence), an exclusive licence and/or a non-exclusive licence for contributions from authors who are: i) UK Crown employees; ii) where BMJ has agreed a CC-BY licence shall apply, and/or iii) in accordance with the terms applicable for US Federal Government officers or employees acting as part of their official duties; on a worldwide, perpetual, irrevocable, royalty-free basis to BMJ Publishing Group Ltd ("BMJ") its licensees and where the relevant Journal is co-owned by BMJ to the co-owners of the Journal, to publish the Work in this journal and any other BMJ products and to exploit all rights, as set out in our [licence](#).

The Submitting Author accepts and understands that any supply made under these terms is made by BMJ to the Submitting Author unless you are acting as an employee on behalf of your employer or a postgraduate student of an affiliated institution which is paying any applicable article publishing charge ("APC") for Open Access articles. Where the Submitting Author wishes to make the Work available on an Open Access basis (and intends to pay the relevant APC), the terms of reuse of such Open Access shall be governed by a Creative Commons licence – details of these licences and which [Creative Commons](#) licence will apply to this Work are set out in our licence referred to above.

Other than as permitted in any relevant BMJ Author's Self Archiving Policies, I confirm this Work has not been accepted for publication elsewhere, is not being considered for publication elsewhere and does not duplicate material already published. I confirm all authors consent to publication of this Work and authorise the granting of this licence.

1  
2  
3 **Structural Ageism Impact on Greater Violence Against Older Persons:**  
4  
5 **A Global Analysis of 56 Countries**  
6  
7  
8  
9

10 E-Shien Chang, M.Phil, M.A.<sup>1\*</sup>, Joan K. Monin, Ph.D.<sup>1</sup>, Daniel Zelterman, Ph.D.<sup>2</sup>,

11  
12  
13  
14 Becca R. Levy, Ph.D.<sup>1,3</sup>  
15  
16  
17  
18  
19

20 <sup>1</sup>Department of Social and Behavioral Sciences, Yale School of Public Health, New Haven,  
21 Connecticut, United States of America  
22  
23

24 <sup>2</sup>Department of Biostatistics, Yale School of Public Health, New Haven, Connecticut, United  
25 States of America  
26  
27  
28

29 <sup>3</sup>Department of Psychology, Yale University, New Haven, Connecticut, United States of  
30 America  
31  
32  
33  
34  
35  
36  
37  
38  
39  
40

41 \*Please address correspondence to:

42 E-Shien Chang, MPhil., M.A.

43 Department of Social and Behavioral Sciences

44 Yale School of Public Health

45 60 College Street

46 New Haven, CT 06520-8034

47 E-mail: [E-Shien.Chang@yale.edu](mailto:E-Shien.Chang@yale.edu)  
48  
49  
50  
51  
52  
53  
54  
55  
56  
57  
58  
59  
60

## Abstract

**Objective:** To determine the association between country-level structural ageism and prevalence of violence against older persons.

**Design:** Country-level ecological study.

**Setting:** Structural ageism data were drawn from the nationally-representative World Values Survey 2010-2014 (WVS), global databases from the World Health Organization (WHO), United Nations (UN), and World Bank. Violence data were based on the Global Burden of Diseases Study 2017 (GBD).

**Participants:** Analysis of 56 countries that represented 63.1% of the world's aging population aged 60 and over across all six of WHO regions.

**Exposure:** Structural ageism, following established structural stigma measures, was a composite combining two components: (1) national policies related to older persons' economic, social, civil, and political rights, based on the four core components of human rights protection in Madrid International Plan of Action on Aging; and (2) prejudicial social norms against older persons, measured by negative attitudes toward older persons in 56 national polls in WVS aggregated to country-level. These two components were z scored and combined such that higher score indicated greater structural ageism.

**Main Outcomes and Measures:** Prevalence rates of violence in 100,000 persons aged 70 and over in each country was based on extensive epidemiological surveillance data, survey, clinical data, and insurance claims in GBD and compiled by the Institute of Health Metrics and Evaluation, University of Washington.

**Results:** There was wide variation in levels of structural ageism across countries. As predicted, structural ageism was significantly associated with the prevalence rates of violence in

1  
2  
3 multivariate models ( $\beta = 205.7$ ,  $SE = 96.3$ ,  $P = .03$ ), after adjusting for relevant covariates.

4  
5 Sensitivity analyses supported the robustness of our findings. That is, structural ageism did not  
6  
7 predict other types of violence and other types of prejudice did not predict violence against older  
8  
9 persons.  
10

11  
12 **Conclusions:** This study provides the first evidence of the association between higher structural  
13  
14 ageism and greater violence against older persons across countries.  
15  
16  
17  
18  
19  
20  
21  
22  
23  
24  
25  
26  
27  
28  
29  
30  
31  
32  
33  
34  
35  
36  
37  
38  
39  
40  
41  
42  
43  
44  
45  
46  
47  
48  
49  
50  
51  
52  
53  
54  
55  
56  
57  
58  
59  
60

### Strengths and Limitations of this study

- The current analysis, which is based on 56 countries that represented 63.1% of the world's aging population aged 60 and over across all six of WHO regions, examines a previously unexplored link between structural ageism and violence against older persons.
- Structural ageism, measured by a composite score combining discriminatory social policies and prejudicial social norms against older persons, was significantly associated with higher prevalence rates of violence against older persons after controlling for sociodemographic, economic, and health covariates.
- By filling gaps in previous analyses of the ageism-health research, the findings underscore the scope of ageism as a social determinant of health.
- The ecological design with country-level information may not provide inference to individual-level data.

## Introduction

Violence directed against older persons is a pervasive public health problem. Globally, prevalence of violence against older persons has increased significantly over the last two decades.<sup>1</sup> One in six older persons experiences elder abuse in the past year.<sup>2</sup> Older persons' safety may be particularly compromised during the current COVID-19 pandemic as they experience increased exposures to wide-spread age-based discrimination, social isolation with perpetrators, and reduced options for support.<sup>3,4</sup> The associated social, psychological, and financial stressors further present significant barriers for reporting and help-seeking.<sup>5</sup> To this end, the United Nations has called for improved protection for older persons' safety and well-being during this health crisis.<sup>6</sup>

Addressing violence against older persons require population-level solutions. The World Health Organization (WHO) and the Centers for Disease Control and Prevention (CDC) have strongly recommended integration of a socio-ecological framework in violence prevention research and practice.<sup>7</sup> Based on this multi-level model, risk factors for violence against older persons operate across individual, relationship, community and societal levels of social ecology, that jointly place individuals at a higher risk of violence victimization and perpetration. However, the majority of research on violence against older persons pertain to individual factors.<sup>8</sup> Compounding this lack of evidence beyond individuals is the disproportionate focus on the deficits of victims that erroneously suggests victims are to be blamed.<sup>9</sup>

Societal-level risk factors in violence against older persons deserve more attention given that interventions are most effective when context-changing strategies are in place.<sup>10</sup> This knowledge void may be owing to a few conceptual, measurement, and methodological challenges. While contexts shape interactions, existing theories have largely overlooked the



1  
2  
3 ways in which macro-level factors, such as policies and cultural norms specific to aging, may be  
4 linked to downstream individual behaviors. To avoid same-person bias in measuring older  
5 persons' social environment,<sup>11</sup> a novel approach that provides a non-self-report indicator is also  
6 needed. Additionally, cross-national comparisons are lacking in this line of research.<sup>8</sup> With data  
7 typically collected in a single country, participants' responses may be restricted by the particular  
8 cultural climate in that country, hence limiting the understanding of the role of societal  
9 determinants on violence victimization and perpetration across cultures.<sup>12</sup>

10  
11  
12  
13  
14  
15  
16  
17  
18  
19 As the most widespread form of bias and prejudice,<sup>13,14</sup> ageism harms older persons'  
20 health simultaneously at both structural and individual levels. At the structural level, ageism is  
21 manifested in the forms of explicit and implicit policies, practices, or social norms that impose  
22 bias and discrimination against older persons. At the individual level, ageism is manifested by  
23 negative age stereotypes and negative self-perceptions of aging. As premised by the Stereotype  
24 Embodiment Theory (SET),<sup>15</sup> both levels are closely intertwined because individual-level  
25 ageism is assimilated by older persons from surrounding cultures that propagate structural  
26 ageism. A recent systematic review based on 7 million older participants across 25 years found  
27 evidence the injurious health effects of structural ageism existed in 45 countries, but none of the  
28 studies included examined violence against older persons as the health outcome.<sup>16</sup>

29  
30  
31  
32  
33  
34  
35  
36  
37  
38  
39  
40  
41  
42  
43  
44  
45  
46  
47  
48  
49  
50  
51  
52  
53  
54  
55  
56  
57  
58  
59  
60  
There are strong theoretical and empirical evidence from parallel tracks of violence  
research against children and women to suggest the potential link between structural ageism and  
violence against older persons.<sup>17</sup> However, until now, this hypothesis has remained an assumed  
link and has not been tested.<sup>18</sup> In this present study, we predicted that structural ageism would  
be associated with greater prevalence of violence against older persons, after adjusting for  
socioeconomic and health risk factors.

## Methods

### Data Sources

Data for our predictor, structural ageism, were drawn from the latest available wave of World Values Survey (WVS) in 2010-2014 and global health databases including the World Health Organization (WHO) and United Nations (UN). The WVS consists of nationally representative polls of individuals' attitudes and behaviors since 1981.<sup>19</sup> Outcome data on the prevalence estimates of violence were drawn from the Global Burden of Disease Study (GBD) in 2017 compiled by the Institute of Health and Metrics Evaluation (IHME) at the University of Washington.<sup>20</sup> Data sources for covariates included WHO and the World Bank. Countries that had data for structural ageism measures and prevalence estimates for violence formed our final analyses, which consisted of 56 countries representing 82,249 respondents in WVS.<sup>19</sup> Together, these countries accounted for 63.1% of the global older population aged 60 years and older, representing all six WHO regions.

### Exposures: Structural Ageism

To operationalize structural ageism, we followed a methodologically-validated approach informed by extensive scholarship on structural stigma: discriminatory social policies and prejudicial social norms.<sup>11,21,22</sup> Discriminatory social policies referred to macro-level policies and practices that discriminate against or restrict the resources and opportunities for older persons. In order to match with prejudicial social norms that were measured between 2010 to 2014 in the WVS, the presence of four policies between 2010 to 2014 selected for the present index reflected four core components of human rights protection in the Madrid International Plan of Action on Aging<sup>23</sup>, including economic, social, civil, and political rights.<sup>24</sup> As the most comprehensive international policy framework to address population aging,<sup>25</sup> the Madrid Plan

1  
2  
3 strives to eliminate all forms of violence and discrimination against older persons.<sup>24</sup> In our  
4  
5 index, the protection of economic rights was based on whether or not each country had enacted  
6  
7 pension reform laws including raising retirement benefits of workers as initially reported by  
8  
9 country, and then subsequently validated and reported by UN experts in UN's World Population  
10  
11 Policies database.<sup>26</sup> The protection of social rights- or recognizing older persons as a social  
12  
13 group deserving of their own rights, was assessed by coding the presence of national policies that  
14  
15 included healthy aging as a priority policy. Each country self-reported whether or not they have  
16  
17 developed laws to protect the well-being of their aging populations. Data were collected and  
18  
19 compiled by United Nations Population Fund (UNFPA).<sup>27</sup> The protection of civil rights was  
20  
21 based on the existence of employment non-discrimination policies for older workers, drawn from  
22  
23 expert evaluation in the publicly available Employment Protection Legislation Database, UN's  
24  
25 International Labor Organizations.<sup>28</sup> The protection of political rights was based on the  
26  
27 existence of constitutional-level protection against age discrimination, reported by each country  
28  
29 and compiled by UNFPA.<sup>27</sup>  
30  
31  
32  
33  
34

35 The absence or presence of each of these 4 policies were summed into a continuous  
36  
37 variable, ranging from 0 to 4. Higher score indicated that a country had greater structural  
38  
39 ageism, as indicated by fewer policies protecting older persons. Overall, 17.9% had one  
40  
41 discriminatory policy, 42.9% had two discriminatory policies, 16.1% had all four indicators of  
42  
43 discriminatory policies. Only one had zero (Spain) (see table 1 in the Supplement).  
44  
45  
46

47 The second domain in our index pertains to societal-level prejudicial attitudes toward  
48  
49 older persons that reflects overarching public opinions.<sup>22,29</sup> Participants in WVS were asked  
50  
51 their level of agreement on "older persons are a burden on society." Score ranged from 1 to 4,  
52  
53 with high levels indicated higher level of burden. The mean value was aggregated at the  
54  
55  
56  
57

1  
2  
3 country-level. Higher values indicate more prejudicial social norms against older persons. Mean  
4  
5 (SD) was 1.8 (0.2) that ranged from 1.2 to 2.4. Overall, 45.0% of all countries reported above-  
6  
7 average level of endorsement in this statement.  
8  
9

10 Following analytical procedures in creating structural stigma indices,<sup>30,31</sup> we standardized  
11  
12 the scores for each of the two domains separately, and then summed up both z-transformed score  
13  
14 to create the structural ageism index. Given the values ranged from negative to positive in  
15  
16 standardized scores, to ease interpretation, we added the positive value of the lowest negative  
17  
18 value across all scores, so that the final scores would be equal or larger than 0. A separate  
19  
20 exploratory factor analysis showed that both domains loaded on the same factor  
21  
22 (eigenvalues>1.0; factor loading= .74), suggesting one underlying latent factor that indicated  
23  
24 structural ageism in the index.  
25  
26  
27

28 Structural ageism was examined as a continuous variable in the bivariate and  
29  
30 multivariable models. As a secondary analysis to quantify risk levels of structural ageism in  
31  
32 relation to prevalence of violence, we operationalized structural ageism as a categorical variable  
33  
34 based on tertiles of final scores (i.e., low-, medium-, and high-level of structural ageism).  
35  
36  
37

### 38 **Outcome: Prevalence Estimates of Violence against Older Persons**

39  
40 We obtained prevalence estimates of violence from the Global Burden of Disease Study  
41  
42 (GBD), one of the most comprehensive cross-national epidemiological studies on injuries,  
43  
44 morbidities, and mortality based on extensive survey, epidemiological surveillance, and clinical  
45  
46 data sources.<sup>20</sup> Recent reiteration of GBD was conducted by the Institute for Health Metrics and  
47  
48 Evaluation (IHME) at the University of Washington using Bayesian meta-regression model to  
49  
50 estimate rates of prevalence for each health and injury domain. In 2017, GBD was based on  
51  
52 68,781 data sources used for the analysis of nonfatal causes of disease and injury for a total of  
53  
54  
55  
56  
57  
58  
59  
60

1  
2  
3 354 causes.<sup>20</sup> Estimates were presented for those 70 and over which we used within each of the  
4  
5 56 countries. GBD defined interpersonal violence according to the International Classification  
6  
7 of Diseases (ICD)-10 (X85-Y08.9, Y87.1)<sup>32</sup> that covered three categories: (1) physical assault by  
8  
9 any means, including firearm, bodily force, sharp or blunt objects, (2) sexual assault by bodily  
10  
11 force, and (3) mistreatment, neglect, and abandonment, including physical abuse, sexual abuse,  
12  
13 torture and cruelty. The prevalence of violence victimization used in this study was prevalence  
14  
15 rate of both fatal and non-fatal violence victimization per 100,000 persons in the age group of 70  
16  
17 years and over that covered all three categories of interpersonal violence.  
18  
19  
20

### 21 **Country-level Covariates**

22  
23  
24 We considered a wide range of socio-demographic and health covariates a priori owing to  
25  
26 the known relationships with violence.<sup>17,33-37</sup> These potential covariates, assessed in 2010 to  
27  
28 match with the timing of the predictor, included (1) population ratio, measured by the proportion  
29  
30 of the population 70 years and older relative to that of the younger-age population (20-69), (2)  
31  
32 gross national income (GNI) per capita (in 1,000 international dollar increments), (3) average  
33  
34 years of schooling, (4) unemployment rate, and (5) alcohol consumption per capita. To maintain  
35  
36 study power and create the most parsimonious model, we performed a backward selection  
37  
38 stepwise regression model based the Akaike Information Criterion (AIC).<sup>38</sup> Stepwise regression  
39  
40 models were commonly applied in previous country-level ecological studies of violence with  
41  
42 relatively smaller sample sizes.<sup>39,40</sup> Three covariates that characterized country-level socio-  
43  
44 economic and health portfolios were retained in the final multivariable model: population ratio,  
45  
46 GNI per capita, and alcohol consumption per capita.  
47  
48  
49  
50

### 51 **Statistical Analysis**

1  
2  
3 Pearson correlation coefficients were used to examine the association between structural  
4 ageism, violence prevalence estimates, and covariates. Bivariate and multivariable linear  
5 regression models were used to estimate the relationship between structural ageism and  
6 prevalence rates of violence. Goodness of fit of the models to the data was evaluated using AIC.  
7 We used residual plots and multi-collinearity diagnostics to examine issues of heteroscedasticity  
8 and multi-collinearity. To evaluate potential outliers in the model, we examined whether any  
9 observations was more than one Cook's distance.<sup>41</sup>

10  
11  
12 To examine the robustness of the findings, we conducted several additional sensitivity  
13 analyses. First, to examine the discriminant validity of the structural ageism index, analyses of  
14 the study were performed replacing the prevalence rates of violence in older age groups with the  
15 estimates of violence in children in the forms of violent disciplines and peer violence. We  
16 hypothesize that structural ageism would not be related to estimates of violence in children. Data  
17 were drawn from nationally representative surveys in the UNICEF global databases.<sup>42</sup> Violent  
18 discipline by caregivers included psychological aggression, physical, and corporal punishment,  
19 as measured by the Parent-Child Conflict Tactics Scale.<sup>43</sup> Peer-violence was measured by the  
20 proportion of students aged 13-15 years who reported being bullied on one or more days in the  
21 past 30 days. The number of countries that had available estimates of violent discipline and peer  
22 violence during years of 2014-2017 that matched with participating countries in WVS were 19,  
23 and 21, respectively.

24  
25  
26 The second sensitivity analysis examined the predictive validity of the structural ageism  
27 index by assessing the relationship between anti-immigrant, racial prejudice and prevalence  
28 estimates interpersonal violence in older age. We hypothesize that anti-immigrant and racial  
29 prejudice attitudes would not be related to interpersonal violence in older age. Anti-immigrant  
30

1  
2  
3 and racial prejudice attitudes were drawn from the WVS. Participants were asked to state which  
4 groups they would not like to have as neighbors: “People of another race,” or  
5  
6 “Immigrants/foreign workers.” This measure has been used to assess negative attitudes toward  
7  
8 minority group members.<sup>44,45</sup>  
9

10  
11  
12 The third sensitivity analysis examined whether the effects of structural ageism on  
13 violence prevalence estimates were only specific to older age groups, but not younger age  
14 groups. Based on GBD 2017, we obtained prevalence rates of violence in age 15 to 49 years old.  
15  
16

17  
18 All analyses were conducted in SAS (version 9.4, SAS Institute Inc., Cary, NC). This  
19 study was exempted by Yale University’s Institutional Review Board.  
20  
21

## 22 **Patient and public involvement**

23  
24  
25 Neither patients nor the public were involved in this research.  
26  
27

## 28 **Results**

29  
30 As predicted, structural ageism was significantly associated with higher prevalence of  
31 violence against older persons. This was found in both bivariate ( $\beta = 261.0$ ,  $SE = 106.0$ ,  $P = .02$ ).  
32  
33 and multivariable models ( $\beta = 205.7$ ,  $SE = 96.3$ ,  $P = .03$ ). After controlling for covariates, a one  
34  
35 standard deviation increase in the structural ageism index was associated with a 205.7 per  
36  
37 100,000 persons increase in the prevalence of violence against older persons aged 70 years and  
38  
39 older. Also as predicted, in a secondary analysis that included the categorization of the low-,  
40  
41 medium-, and high- structural ageism predictor, there was a linear pattern between increasing  
42  
43 levels of ageism and higher prevalence rates of violence, after adjusting for covariates (test for  
44  
45 linear trend:  $P = .02$ ) (figure 1).  
46  
47  
48  
49

50  
51 With respect to model diagnostics, collinearity diagnostics indicated no evidence of  
52 multicollinearity. Residual plots have confirmed the model assumptions (normality and  
53  
54  
55  
56  
57

1  
2  
3 homoscedasticity of residuals) had been met. All but two cases (China and Qatar) had a larger  
4 than Cook's Distance cut-off of one for outliers. When we removed China and Qatar  
5  
6 respectively from the multivariable model estimates, the positive association between structural  
7  
8 ageism and prevalence remained significant.  
9  
10

11  
12 Our results showed wide variation in levels of structural ageism across countries, with  
13  
14 higher value indicating greater structural ageism (total values ranged from 0 to 7.3) (table 1).  
15  
16 Nigeria, Lebanon, and Belarus reported highest structural ageism. Uzbekistan, Cyprus, and  
17  
18 Spain had the lowest structural ageism. China, Russia, and Zimbabwe had the highest  
19  
20 prevalence rates of violence against older persons; whereas Singapore, Germany, and Egypt had  
21  
22 the lowest prevalence rates of violence against older persons.  
23  
24

25  
26 Results from three sensitivity analyses suggested the robustness of the results. First, in  
27  
28 support of the discriminant validity of structural ageism index, ageism was not correlated with  
29  
30 violent discipline ( $R=0.31$ ,  $P=.21$ ) or bullying ( $R=-0.13$ ,  $p=.59$ ). Second, in support of the  
31  
32 predictive validity of structural ageism index, anti-immigrant and racial prejudice were not  
33  
34 correlated with violence estimates against older persons ( $R=-0.18$ ,  $P=.20$ ;  $R=-0.17$ ,  $P=.20$ ;  
35  
36 respectively). Third, the relationship between structural ageism and violence was non-significant  
37  
38 in the younger age group of 15 to 49 years old, suggesting the validity of our findings.  
39  
40

## 41 42 **Discussion**

43  
44 This study investigated a previously unexplored relationship between structural ageism  
45  
46 and violence against older persons. As predicted, we found that structural ageism is significantly  
47  
48 associated with prevalence rates of violence against persons aged 70 and over, after controlling  
49  
50 for known risk factors. Findings in this study may help policymakers, national and international  
51  
52  
53  
54  
55  
56  
57  
58  
59  
60



1  
2  
3 health authorities, and health care professionals address the growing global health burden of  
4  
5 violence in older persons.  
6

7  
8 Public health research on improving support structures and societal-based solutions is  
9  
10 needed to effectively prevent violence against older persons at a large scale, especially in times  
11  
12 of unrest and relative instability. A recent CDC report estimated that the rate of nonfatal assaults  
13  
14 against persons 60 years and older has risen by 53% between 2008 and 2016.<sup>46</sup> Additionally,  
15  
16 recent reports have indicated increasing rates of interpersonal violence in family settings during  
17  
18 the ongoing COVID-19 pandemic.<sup>47</sup> As social isolation and psychological stressors continue to  
19  
20 intensify during the ongoing pandemic as the consequences of self-quarantine, expanding  
21  
22 structural-level program response to improve the safety of older persons would be essential.  
23  
24

25  
26 The mechanism through which structural ageism elevated risks for violence victimization  
27  
28 in older persons warrants further investigation. As premised by SET,<sup>15</sup> ageism operated at the  
29  
30 structural level is assimilated and internalized at the individual level. Thus, it could be that the  
31  
32 legitimization of unfair treatment based on age, compounded by disparaging views of older  
33  
34 persons, would allow for greater tolerance for violence and likely make violence and abuse more  
35  
36 permissive for perpetrators.<sup>48</sup> Additionally, one might postulate that in social contexts that  
37  
38 denigrate a group, individuals tend to be more accepting in violence toward that group. For  
39  
40 instance, research in family violence has found that cultures with greater sexism exhibited higher  
41  
42 tolerance of intimate partner violence.<sup>49,50</sup> These structural mechanisms remain to be tested in  
43  
44 future research.  
45  
46  
47

48  
49 A strength of our investigation was it examined country-level structural ageism  
50  
51 combining social laws and norms. The wide variation in country-level attitudes toward older  
52  
53 persons was in line with previous cross-cultural analyses.<sup>51,52</sup> In the domain of policies, we also  
54  
55  
56  
57

1  
2  
3 found variation in the level of each country's protection toward older persons. This may be a  
4 reflection of the gap in existing legal provisions and international conventions specifically  
5 supporting the rights of older persons.<sup>53</sup>  
6  
7

8  
9  
10 Congruent with intersectional theories,<sup>54</sup> our findings showed that countries reported  
11 higher structural ageism coincided with those that also reported greater inequality in other realms  
12 of stigma. For instance, Nigeria ranked among the highest in structural ageism in this study as  
13 well as highest in structural stigma against sexual minorities in a recent cross-cultural study of  
14 197 countries.<sup>55</sup> The opposite estimate was found in Spain where it ranked among the lowest in  
15 both structural stigma measures. As structural systems of oppression are often mutually  
16 manifested to reinforce health inequalities, analyses that only focus on gender, race, ethnicity  
17 alone are insufficient to understand population-level health disparities.<sup>56</sup> Future efforts are  
18 needed to examine the joint effects of multiple intersecting stigmas, including age stigma, in  
19 predicting health.  
20  
21  
22  
23  
24  
25  
26  
27  
28  
29  
30  
31  
32

33 Integrating structural ageism as a societal-level risk factor in existing elder abuse research  
34 may also help inject a multi-systemic, socio-cultural lens in developing much-needed  
35 interventions.<sup>57</sup> Theories of elder abuse have been predominantly interpersonal in nature, where  
36 victims of abuse were typically described as uniformly dependent and powerless.<sup>58-60</sup> The  
37 emphasis on older persons' vulnerabilities not only erroneously intensifies victim-blaming, but  
38 also shifts our attention away from the broader status inequality that each individual is embedded  
39 in. Considering the ways in which structural ageism seep through social interactions and its  
40 downstream consequences in shaping the inherent power imbalance between victims,  
41 perpetrators, and their environments can offer promising opportunities for primary prevention  
42 strategies.<sup>48</sup>  
43  
44  
45  
46  
47  
48  
49  
50  
51  
52  
53  
54  
55  
56  
57  
58  
59  
60

1  
2  
3 Our findings hold important implications for violence prevention programming. First,  
4  
5 ageism that operates at both individual and structural level deserves more consideration in  
6  
7 estimating the occurrence of violence and abuse in older persons. Second, social and legal  
8  
9 policies are inherently public health policies.<sup>61</sup> Social policies that protect the rights of older  
10  
11 persons may reap significant public health benefits for population-level violence preventions.  
12  
13 Third, as existing approaches for violence preventions are tailored toward individual ecology,  
14  
15 positioning structural ageism as a societal risk factor of violence against older persons may help  
16  
17 catalyze a paradigm shift in refining current primary preventions against violence and abuse.  
18  
19 Such structural approach may focus on reducing ageism through improving political-legal,  
20  
21 economic, as well as intergenerational support for older persons.<sup>3</sup>  
22  
23  
24  
25

## 26 **Conclusions**

27  
28 Our results highlight that structural ageism is a social determinant of aging health  
29  
30 disparities that deserved attention. Public health and population-based violence prevention  
31  
32 policies may benefit from a targeted approach that tackles the harmful effects of structural  
33  
34 ageism.  
35  
36  
37  
38  
39  
40  
41  
42  
43  
44  
45  
46  
47  
48  
49  
50  
51  
52  
53  
54  
55  
56  
57  
58  
59  
60

## Contributors

EC was involved in study conceptualization and design, data collection, analyses, interpretation of results and manuscript writing. JM and DZ contributed to study design, analyses and manuscript writing. BL contributed to study conceptualization and design, supervised analyses, and contributed to interpretation of results and manuscript writing.

## Funding Statement

This study was supported by the Samuel and Liselotte Herman Fellowship, Yale School of Public Health to the first author, National Institute on Aging grants to the second author (R01AG058565, R21AG055861-01A1), National Institutes on Health grants to the third author (P50-CA196530, P30-CA16359, R01-CA177719, R01-ES005775, R41-A120546, U48-DP005023, R01-CA168733), and a National Institute on Aging grant (U01AG032284) to the senior author.

## Reference List

1. World Health Organization. *Global status report on violence prevention*. Geneva, Switzerland: World Health Organization, 2014.
2. Yon Y, Mikton CR, Gassoumis ZD, Wilber KH. Elder abuse prevalence in community settings: a systematic review and meta-analysis. *Lancet Glob Health*. 2017;5(2):e147-e156.
3. Ayalon L, Chasteen A, Diehl M, et al. Aging in times of the COVID-19 pandemic: Avoiding ageism and fostering intergenerational solidarity [published online ahead of print April 16 2020]. *J Gerontol B Psychol Sci Soc Sci*. 2020; doi: 10.1093/geronb/gbaa051.
4. Han SD, Mosqueda L. Elder abuse in the COVID-19 era [published online ahead of print April 20 2020]. *J Am Geriatr Soc*. 2020; doi: 10.1111/jgs.16496.
5. Elman A, Breckman R, Clark S, et al. Effects of the COVID-19 outbreak on elder mistreatment and response in New York City: Initial lessons [published online ahead of print May 8 2020]. *J Appl Gerontol*. 2020; doi: 10.1177/0733464820924853.
6. United Nations. “Unacceptable” – UN expert urges better protection of older persons facing the highest risk of the COVID-19 pandemic. Geneva, Switzerland 2020.
7. Dahlberg LK, EG.; Violence-a global public health problem. In: Krug ED, LL.; Mercy, JA.;, ed. *World Report on Violence and Health*. Geneva, Switzerland, World Health Organization 2002:1-56.
8. Pillemer K, Burnes D, Riffin C, Lachs MS. Elder abuse: Global situation, risk factors, and prevention strategies. *Gerontologist*. 2016;56 Suppl 2:S194-205.
9. Liu PJ, Conrad KJ, Beach SR, Iris M, Schiamberg LB. The importance of investigating Abuser Characteristics in Elder Emotional/Psychological Abuse: Results from Adult Protective Services Data. *J Gerontol B Psychol Sci Soc Sci*. 2017; 74(5):897-907.
10. Frieden TR. A framework for public health action: the health impact pyramid. *Am J Public Health*. 2010;100(4):590-595.
11. Hatzenbuehler ML. Structural stigma and health inequalities: Research evidence and implications for psychological science. *Am Psychol*. 2016;71(8).

12. Pachankis JE, Branstrom R. Hidden from happiness: Structural stigma, sexual orientation concealment, and life satisfaction across 28 countries. *J Consult Clin Psychol*. 2018;86(5):403-415.
13. Levy BR, Slade MD, Chang ES, Kanno S, Wang SY. Ageism amplifies cost and prevalence of health conditions. *Gerontologist*. 2020;60(1):174-181.
14. Nelson TD. *Ageism: Stereotyping and prejudice against older persons*. Cambridge, MA: Massachusetts Institute of Technology; 2002.
15. Levy B. Stereotype embodiment: A psychosocial approach to aging. *Curr Dir Psychol Sci*. 2009;18(6):332-336.
16. Chang ES, Kanno S, Levy S, Wang SY, Lee JE, Levy BR. Global reach of ageism on older persons' health: A systematic review. *PLoS One*. 2020;15(1):e0220857.
17. Wilkins N, Tsao B, Hertz M, Davis R, Klevens J. *Connecting the dots: An overview of the links among multiple forms of violence*. Oakland CA: National Center for Injury Prevention and Control;2014.
18. Kosber J, Nahmiash D. Characteristics of Victims and Perpetrators and Milieus of Abuse and Neglect. In: Baumhover L, Beall S, eds. *Abuse, Neglect, and Exploitation of Older Persons: Strategies for Assessment and Intervention*. Baltimore: Health Professions Press; 1996.
19. Inglehart R, Haerpfer C, Moreno C, et al. *World Values Survey: Round six - Country-pooled datafile version*. Madrid: JD Systems Institute;2014.
20. Global, regional, and national incidence, prevalence, and years lived with disability for 354 diseases and injuries for 195 countries and territories, 1990-2017: a systematic analysis for the Global Burden of Disease Study 2017. *Lancet*. 2018;392(10159):1789-1858.
21. Hatzenbuehler ML, Phelan JC, Link BG. Stigma as a fundamental cause of population health inequalities. *Am J Public Health*. 2013;103(5):813-821.
22. Pachankis JE, Hatzenbuehler ML, Hickson F, et al. Hidden from health: structural stigma, sexual orientation concealment, and HIV across 38 countries in the European MSM Internet Survey. *AIDS*. 2015;29(10):1239-1246.
23. United Nations Development Programme. *Implementing the Madrid Plan of Action on Ageing: What have we learned? And, where do we go from here?* 2018.

- 1
  - 2
  - 3
  - 4
  - 5
  - 6
  - 7
  - 8
  - 9
  - 10
  - 11
  - 12
  - 13
  - 14
  - 15
  - 16
  - 17
  - 18
  - 19
  - 20
  - 21
  - 22
  - 23
  - 24
  - 25
  - 26
  - 27
  - 28
  - 29
  - 30
  - 31
  - 32
  - 33
  - 34
  - 35
  - 36
  - 37
  - 38
  - 39
  - 40
  - 41
  - 42
  - 43
  - 44
  - 45
  - 46
  - 47
  - 48
  - 49
  - 50
  - 51
  - 52
  - 53
  - 54
  - 55
  - 56
  - 57
  - 58
  - 59
  - 60
24. United Nations. *Political declaration and Madrid International Plan of Action on Ageing*. New York, 2002.
25. Sidorenko A. Implementation of the Madrid International Plan of Action on Aging: Research dimension. *Geriatrics and Gerontology International*. 2004;4:S87-S89.
26. United Nations. *World population policies 2013*. 2013.
27. United Nations Population Fund, HelpAge International. *Overview of available policies and legislation, data and research, and insitutional arrangements relating to older persons- Progress since Madrid*. New York, 2012.
28. International Labor Organization. *Employment Protection Legislation Database ILO EPLex Online Database*. <https://www.ilo.org/dyn/epllex/termmain.home>. Accessed June 15, 2020.
29. Evans-Lacko S, Brohan E, Mojtabai R, Thornicroft G. Association between public views of mental illness and self-stigma among individuals with mental illness in 14 European countries. *Psychol Med*. 2012;42(8):1741-1752.
30. Hatzenbuehler ML, Jun H-J, Corliss HL, Austin SB. Structural stigma and cigarette smoking in a prospective cohort study of sexual minority and heterosexual youth. *Ann Behav Med*. 2014;47(1):48-56.
31. Hatzenbuehler ML. The social environment and suicide attempts in lesbian, gay, and bisexual youth. *Pediatrics*. 2011;127(5):896-903.
32. World Health Organization. *The ICD-10 classification of mental and behavioural disorders: Clinical descriptions and diagnostic guidelines*. Geneva, Switzerland: World Health Organization,;1992.
33. North MS, Fiske ST. Modern attitudes toward older adults in the aging world: A cross-cultural meta-analysis. *Psychological bulletin*. 2015;141(5):993-1021.
34. Renno Santos M, Testa A, Porter LC, Lynch JP. The contribution of age structure to the international homicide decline. *PLoS One*. 2019;14(10):e0222996.
35. Marques S, Marriano J, Mendonca J, et al. Determinants of ageism against older adults: A systematic review of quantitative evidence. *Int J Environ Res Public Health*. 2020;17(7): 2560
36. Wolf A, Gray R, Fazel S. Violence as a public health problem: an ecological study of 169 countries. *Soc Sci Med*. 2014;104(100):220-227.

- 1  
2  
3 37. Krug EG, Mercy JA, Dahlberg LL, Zwi AB. The world report on violence and health.  
4 *Lancet (London, England)*. 2002;360 (9339):1083-1088.  
5
- 6 38. Aho K, Derryberry D, Peterson T. Model selection for ecologists: the worldviews of AIC  
7 and BIC. *Ecology*. 2014;95(3):631-636.  
8
- 9 39. Sardinha L, Nájera Catalán HE. Attitudes towards domestic violence in 49 low- and  
10 middle-income countries: A gendered analysis of prevalence and country-level correlates.  
11 *PLoS One*. 2018;13(10):e0206101-e0206101.  
12
- 13 40. Elgar FJ, Donnelly PD, Michaelson V, et al. Corporal punishment bans and physical  
14 fighting in adolescents: an ecological study of 88 countries. *BMJ Open*.  
15 2018;8(9):e021616.  
16
- 17 41. Cook D, Weisberg S. *Residuals and influence in regression*. New York, NY: Chapman  
18 & Hall; 1982.  
19
- 20 42. UNICEF Databases. *Violent discipline*. UN2020. [https://data.unicef.org/topic/child-  
21 protection/violence/violent-discipline/](https://data.unicef.org/topic/child-protection/violence/violent-discipline/). Accessed June 15, 2020  
22
- 23 43. Straus MA, Hamby SL, Finkelhor D, Moore DW, Runyan D. Identification of child  
24 maltreatment with the Parent-Child Conflict Tactics Scales: development and  
25 psychometric data for a national sample of American parents. *Child abuse & neglect*.  
26 1998;22(4):249-270.  
27
- 28 44. Haney JL. Predictors of Homonegativity in the United States and the Netherlands Using  
29 the Fifth Wave of the World Values Survey. *J Homosex*. 2016;63(10):1355-1377.  
30
- 31 45. Ceobanu A, Escandell X. Comparative analyses of public attitudes toward immigrants  
32 and immigration using multinational survey data: A review of theories and research.  
33 *Annual review of sociology*. 2010;36.  
34
- 35 46. Logan J, Haileyesus T, Ertl A, Rostad W, Herbst J. Nonfatal assaults and homicides  
36 among adults aged  $\geq 60$  years — United States, 2002–2016. *MMWR Morb Mortal Wkly*  
37 *Rep*. 2019;68:297-302.  
38
- 39 47. Peterman A, Potts A, O'Donnell M, Thompson K, Shah N, Oertelt-Prigione S. *Pandemics*  
40 *and violence against women and children*. Washington, DC: Center for Global  
41 Development2020.  
42
- 43 48. Phelan A, Ayalon L. The intersection of ageism and elder abuse. *Advances in elder abuse*  
44 *research, international perspectives*. Switzerland: Springer; 2020:11-22.  
45  
46  
47  
48  
49  
50  
51  
52  
53  
54  
55  
56  
57  
58  
59  
60



- 1  
2  
3 49. Reichl AJ, Ali JI, Uyeda K. Latent Sexism in print ads increases acceptance of sexual  
4 assault. *SAGE Open*. 2018;8(2):2158244018769755.  
5  
6 50. Ward M. Media and sexualization: State of empirical research, 1995–2015. *Journal of*  
7 *Sex Research*. 2016;53(4-5):560-577.  
8  
9 51. Nash P, Officer A, de la Fuente-Nunez V, Schneiders M, Thiyagarajan J. Global trends in  
10 ageist disposition: comparing low, middle, and high income countries using the World  
11 Values Sruvey wave 6. *Innovation in Aging*. 2018;2:34.  
12  
13 52. Nash P, Schneiders M, Officer A, Jotheeswaran A. Respected or a burden: Global  
14 attitudes toward older people using the World Values Survey Wave 6. *Innovation in*  
15 *Aging*. 2017;1(S1):116.  
16  
17 53. Doron I, Apter I. The debate around the need for an international convention on the rights  
18 of older persons. *Gerontologist*. 2010;50(5):586-593.  
19  
20 54. Crenshaw K. Demarginalizing the intersection of race and sex: A black feminist critique  
21 of antidiscrimination doctrine, feminist theory and antiracist politics. *University of*  
22 *Chicago Legal Forum*. 1989;1989(1).  
23  
24 55. Pachankis JE, Branstrom R. How many sexual minorities are hidden? Projecting the size  
25 of the global closet with implications for policy and public health. *PLoS One*.  
26 2019;14(6):e0218084.  
27  
28 56. Cole ER. Intersectionality and research in psychology. *Am Psychol*. 2009;64(3):170-180.  
29  
30 57. Roberto KA, Teaster PB. Theorizing elder abuse. In: Dong X, ed. *Elder abuse*.  
31 Switzerland: Springer; 2017:21-44.  
32  
33 58. Anetzberger GJ. An update on the nature and scope of elder abuse. *Generations*.  
34 2012(36):12-20.  
35  
36 59. Wolf RS. Elder abuse: An introduction. *Generations*. 2000;20(4):301-305.  
37  
38 60. Burnight K, Mosqueda L. *Theoretical model development in elder mistreatment* 2011;  
39 National Institute of Justice, Office of Justice Programs, U.S. Department of Justice.  
40  
41 61. Philbin MM, Flake M, Hatzenbuehler ML, Hirsch JS. State-level immigration and  
42 immigrant-focused policies as drivers of Latino health disparities in the United States.  
43 *Soc Sci Med*. 2018;199:29-38.  
44  
45  
46  
47  
48  
49  
50  
51  
52  
53  
54  
55  
56  
57  
58  
59  
60

Figure 1. Higher structural ageism is associated with greater prevalence rates of violence against older persons.

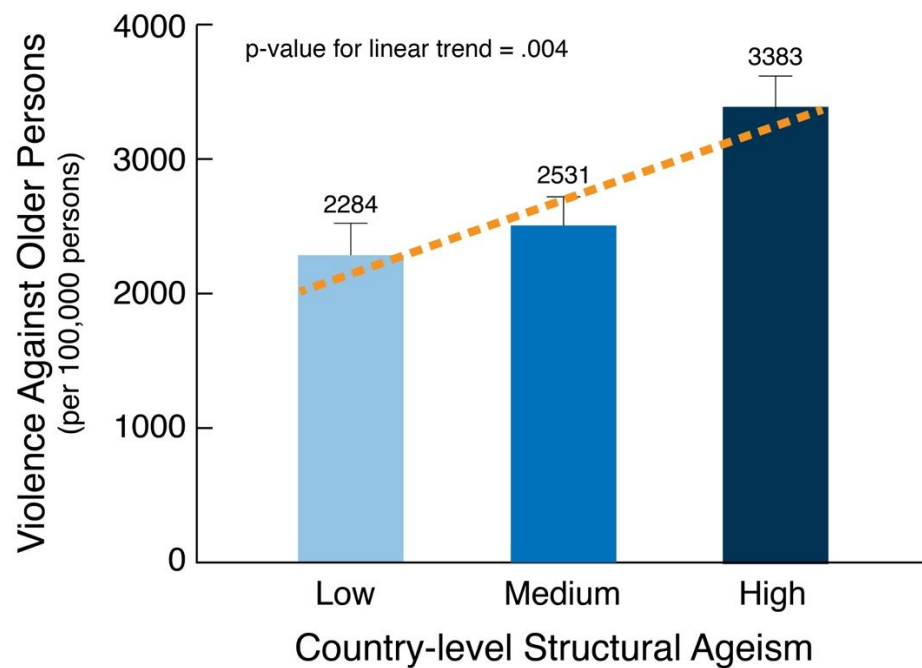

eTable 1. Country-Level Structural Ageism and Prevalence Rates of Violence Against Older Persons in 56 countries

| Country    | Structural Ageism | Prevalence<br><i>Rates of violence per<br/>100,000 persons</i> | Country      | Structural Ageism | Prevalence<br><i>Rates of violence per<br/>100,000 persons</i> |
|------------|-------------------|----------------------------------------------------------------|--------------|-------------------|----------------------------------------------------------------|
| Algeria    | 3.0               | 1516.0                                                         | Morocco      | 4.0               | 1466.7                                                         |
| Argentina  | 2.5               | 2939.6                                                         | Netherlands  | 1.3               | 1570.2                                                         |
| Armenia    | 2.1               | 2658.0                                                         | New Zealand  | 1.6               | 3340.4                                                         |
| Australia  | 2.1               | 2968.4                                                         | Nigeria      | 7.3               | 3605.2                                                         |
| Azerbaijan | 1.4               | 3065.7                                                         | Pakistan     | 4.8               | 2370.4                                                         |
| Belarus    | 5.5               | 4348.2                                                         | Peru         | 3.2               | 1699.5                                                         |
| Brazil     | 2.0               | 2502.5                                                         | Philippines  | 4.3               | 4445.2                                                         |
| Chile      | 2.1               | 2575.1                                                         | Poland       | 3.3               | 2336.9                                                         |
| China      | 4.5               | 7109.6                                                         | Qatar        | 1.7               | 1729.5                                                         |
| Columbia   | 3.4               | 3316.0                                                         | Romania      | 4.3               | 2601.5                                                         |
| Cyprus     | 0.3               | 1783.4                                                         | Russia       | 3.1               | 5300.1                                                         |
| Ecuador    | 2.8               | 2534.2                                                         | Rwanda       | 5.3               | 4147.4                                                         |
| Egypt      | 3.6               | 1271.0                                                         | Singapore    | 3.9               | 1331.7                                                         |
| Estonia    | 3.5               | 4287.0                                                         | Slovenia     | 4.2               | 2639.6                                                         |
| Georgia    | 2.9               | 2233.8                                                         | South Africa | 5.0               | 4481.1                                                         |
| Germany    | 2.7               | 1329.5                                                         | South Korea  | 2.5               | 1446.8                                                         |
| Ghana      | 5.4               | 2962.3                                                         | Spain        | 0.4               | 1554.4                                                         |
| Haiti      | 4.3               | 3558.5                                                         | Sweden       | 1.6               | 1913.8                                                         |
| Iraq       | 4.8               | 2009.2                                                         | Thailand     | 3.9               | 3312.5                                                         |

1  
2  
3  
4  
5  
6  
7  
8  
9  
10  
11  
12  
13  
14  
15  
16  
17  
18  
19  
20  
21  
22  
23  
24  
25  
26  
27  
28  
29  
30  
31  
32  
33  
34  
35  
36  
37  
38  
39  
40  
41  
42  
43  
44  
45  
46  
47

---

|                 |     |        |                     |     |        |
|-----------------|-----|--------|---------------------|-----|--------|
| Japan           | 1.6 | 1642.6 | Trinidad and Tobago | 2.7 | 2723.7 |
| Jordan          | 2.6 | 1738.3 | Tunisia             | 4.3 | 1506.3 |
| Kazakhstan      | 3.5 | 3238.2 | Turkey              | 3.9 | 1747.6 |
| Kuwait          | 4.1 | 1605.9 | Ukraine             | 4.4 | 4647.7 |
| Kyrgyz Republic | 3.0 | 2815.9 | Uruguay             | 4.4 | 2818.6 |
| Lebanon         | 7.2 | 1610.9 | United States       | 2.6 | 4031.8 |
| Libya           | 4.2 | 1501.1 | Uzbekistan          | 0.0 | 2331.1 |
| Malaysia        | 2.8 | 2805.2 | Yemen               | 2.5 | 1392.6 |
| Mexico          | 2.7 | 3404.4 | Zimbabwe            | 4.2 | 5082.5 |

For peer review only

## STROBE Statement—checklist of items that should be included in reports of observational studies

|                              | Item No | Recommendation                                                                                                                                                                                                                                                                                                                                                                                                                                                         | Page No |
|------------------------------|---------|------------------------------------------------------------------------------------------------------------------------------------------------------------------------------------------------------------------------------------------------------------------------------------------------------------------------------------------------------------------------------------------------------------------------------------------------------------------------|---------|
| <b>Title and abstract</b>    | 1       | (a) Indicate the study's design with a commonly used term in the title or the abstract                                                                                                                                                                                                                                                                                                                                                                                 | 2       |
|                              |         | (b) Provide in the abstract an informative and balanced summary of what was done and what was found                                                                                                                                                                                                                                                                                                                                                                    | 2-3     |
| <b>Introduction</b>          |         |                                                                                                                                                                                                                                                                                                                                                                                                                                                                        |         |
| Background/rationale         | 2       | Explain the scientific background and rationale for the investigation being reported                                                                                                                                                                                                                                                                                                                                                                                   | 5-6     |
| Objectives                   | 3       | State specific objectives, including any prespecified hypotheses                                                                                                                                                                                                                                                                                                                                                                                                       | 6       |
| <b>Methods</b>               |         |                                                                                                                                                                                                                                                                                                                                                                                                                                                                        |         |
| Study design                 | 4       | Present key elements of study design early in the paper                                                                                                                                                                                                                                                                                                                                                                                                                | 7       |
| Setting                      | 5       | Describe the setting, locations, and relevant dates, including periods of recruitment, exposure, follow-up, and data collection                                                                                                                                                                                                                                                                                                                                        | 7       |
| Participants                 | 6       | (a) <i>Cohort study</i> —Give the eligibility criteria, and the sources and methods of selection of participants. Describe methods of follow-up<br><i>Case-control study</i> —Give the eligibility criteria, and the sources and methods of case ascertainment and control selection. Give the rationale for the choice of cases and controls<br><i>Cross-sectional study</i> —Give the eligibility criteria, and the sources and methods of selection of participants | 7-11    |
|                              |         | (b) <i>Cohort study</i> —For matched studies, give matching criteria and number of exposed and unexposed<br><i>Case-control study</i> —For matched studies, give matching criteria and the number of controls per case                                                                                                                                                                                                                                                 | 7-11    |
| Variables                    | 7       | Clearly define all outcomes, exposures, predictors, potential confounders, and effect modifiers. Give diagnostic criteria, if applicable                                                                                                                                                                                                                                                                                                                               | 7-11    |
| Data sources/<br>measurement | 8*      | For each variable of interest, give sources of data and details of methods of assessment (measurement). Describe comparability of assessment methods if there is more than one group                                                                                                                                                                                                                                                                                   | 7-11    |
| Bias                         | 9       | Describe any efforts to address potential sources of bias                                                                                                                                                                                                                                                                                                                                                                                                              | 7-11    |
| Study size                   | 10      | Explain how the study size was arrived at                                                                                                                                                                                                                                                                                                                                                                                                                              | 7-11    |
| Quantitative variables       | 11      | Explain how quantitative variables were handled in the analyses. If applicable, describe which groupings were chosen and why                                                                                                                                                                                                                                                                                                                                           | 7-11    |
| Statistical methods          | 12      | (a) Describe all statistical methods, including those used to control for confounding                                                                                                                                                                                                                                                                                                                                                                                  | 10-11   |
|                              |         | (b) Describe any methods used to examine subgroups and interactions                                                                                                                                                                                                                                                                                                                                                                                                    | 10-11   |
|                              |         | (c) Explain how missing data were addressed                                                                                                                                                                                                                                                                                                                                                                                                                            | 10-11   |
|                              |         | (d) <i>Cohort study</i> —If applicable, explain how loss to follow-up was addressed<br><i>Case-control study</i> —If applicable, explain how matching of cases and controls was addressed<br><i>Cross-sectional study</i> —If applicable, describe analytical methods taking account of sampling strategy                                                                                                                                                              | 10-11   |

1  
2  
3  
4  
5  
6  
7  
8  
9  
10  
11  
12  
13  
14  
15  
16  
17  
18  
19  
20  
21  
22  
23  
24  
25  
26  
27  
28  
29  
30  
31  
32  
33  
34  
35  
36  
37  
38  
39  
40  
41  
42  
43  
44  
45  
46  
47  
48  
49  
50  
51  
52  
53  
54  
55  
56  
57  
58  
59  
60

(e) Describe any sensitivity analyses

10-  
11

Continued on next page

For peer review only

1  
2  
3  
4  
5  
6  
7  
8  
9  
10  
11  
12  
13  
14  
15  
16  
17  
18  
19  
20  
21  
22  
23  
24  
25  
26  
27  
28  
29  
30  
31  
32  
33  
34  
35  
36  
37  
38  
39  
40  
41  
42  
43  
44  
45  
46  
47  
48  
49  
50  
51  
52  
53  
54  
55  
56  
57  
58  
59  
60

| <b>Results</b>           |     |                                                                                                                                                                                                              |       |
|--------------------------|-----|--------------------------------------------------------------------------------------------------------------------------------------------------------------------------------------------------------------|-------|
| Participants             | 13* | (a) Report numbers of individuals at each stage of study—eg numbers potentially eligible, examined for eligibility, confirmed eligible, included in the study, completing follow-up, and analysed            | 12    |
|                          |     | (b) Give reasons for non-participation at each stage                                                                                                                                                         | 12    |
|                          |     | (c) Consider use of a flow diagram                                                                                                                                                                           | 12    |
| Descriptive data         | 14* | (a) Give characteristics of study participants (eg demographic, clinical, social) and information on exposures and potential confounders                                                                     | 12-13 |
|                          |     | (b) Indicate number of participants with missing data for each variable of interest                                                                                                                          | 12-13 |
|                          |     | (c) <i>Cohort study</i> —Summarise follow-up time (eg, average and total amount)                                                                                                                             | N/A   |
| Outcome data             | 15* | <i>Cohort study</i> —Report numbers of outcome events or summary measures over time                                                                                                                          | N/A   |
|                          |     | <i>Case-control study</i> —Report numbers in each exposure category, or summary measures of exposure                                                                                                         | N/A   |
|                          |     | <i>Cross-sectional study</i> —Report numbers of outcome events or summary measures                                                                                                                           | 12-13 |
| Main results             | 16  | (a) Give unadjusted estimates and, if applicable, confounder-adjusted estimates and their precision (eg, 95% confidence interval). Make clear which confounders were adjusted for and why they were included | 12-13 |
|                          |     | (b) Report category boundaries when continuous variables were categorized                                                                                                                                    | 12-13 |
|                          |     | (c) If relevant, consider translating estimates of relative risk into absolute risk for a meaningful time period                                                                                             | 12-13 |
| Other analyses           | 17  | Report other analyses done—eg analyses of subgroups and interactions, and sensitivity analyses                                                                                                               | 12-13 |
| <b>Discussion</b>        |     |                                                                                                                                                                                                              |       |
| Key results              | 18  | Summarise key results with reference to study objectives                                                                                                                                                     | 13-14 |
| Limitations              | 19  | Discuss limitations of the study, taking into account sources of potential bias or imprecision. Discuss both direction and magnitude of any potential bias                                                   | 14-15 |
| Interpretation           | 20  | Give a cautious overall interpretation of results considering objectives, limitations, multiplicity of analyses, results from similar studies, and other relevant evidence                                   | 14-15 |
| Generalisability         | 21  | Discuss the generalisability (external validity) of the study results                                                                                                                                        | 14-15 |
| <b>Other information</b> |     |                                                                                                                                                                                                              |       |
| Funding                  | 22  | Give the source of funding and the role of the funders for the present study and, if applicable, for the original study on which the present article is based                                                | 17    |

\*Give information separately for cases and controls in case-control studies and, if applicable, for exposed and unexposed groups in cohort and cross-sectional studies.

**Note:** An Explanation and Elaboration article discusses each checklist item and gives methodological background and published examples of transparent reporting. The STROBE checklist is best used in conjunction with this article (freely available on the Web sites of PLoS Medicine at <http://www.plosmedicine.org/>, Annals of Internal Medicine at <http://www.annals.org/>, and Epidemiology at <http://www.epidem.com/>). Information on the STROBE Initiative is available at [www.strobe-statement.org](http://www.strobe-statement.org).

# BMJ Open

## Impact of Structural Ageism on Greater Violence Against Older Persons: A Cross-National Study of 56 Countries

|                                 |                                                                                                                                                                                                                                                                                                                                                                                    |
|---------------------------------|------------------------------------------------------------------------------------------------------------------------------------------------------------------------------------------------------------------------------------------------------------------------------------------------------------------------------------------------------------------------------------|
| Journal:                        | <i>BMJ Open</i>                                                                                                                                                                                                                                                                                                                                                                    |
| Manuscript ID                   | bmjopen-2020-042580.R1                                                                                                                                                                                                                                                                                                                                                             |
| Article Type:                   | Original research                                                                                                                                                                                                                                                                                                                                                                  |
| Date Submitted by the Author:   | 26-Mar-2021                                                                                                                                                                                                                                                                                                                                                                        |
| Complete List of Authors:       | Chang, E-Shien; Yale University School of Public Health, Social and Behavioral Sciences<br>Monin, Joan ; Yale University School of Public Health, Social and Behavioral Sciences<br>Zelterman, Daniel; Yale University School of Public Health, Biostatistics<br>Levy, Becca; Yale University School of Public Health, Social and Behavioral Sciences; Yale University, Psychology |
| <b>Primary Subject Heading</b>: | Public health                                                                                                                                                                                                                                                                                                                                                                      |
| Secondary Subject Heading:      | Global health                                                                                                                                                                                                                                                                                                                                                                      |
| Keywords:                       | GERIATRIC MEDICINE, PUBLIC HEALTH, SOCIAL MEDICINE                                                                                                                                                                                                                                                                                                                                 |
|                                 |                                                                                                                                                                                                                                                                                                                                                                                    |

SCHOLARONE™  
Manuscripts





I, the Submitting Author has the right to grant and does grant on behalf of all authors of the Work (as defined in the below author licence), an exclusive licence and/or a non-exclusive licence for contributions from authors who are: i) UK Crown employees; ii) where BMJ has agreed a CC-BY licence shall apply, and/or iii) in accordance with the terms applicable for US Federal Government officers or employees acting as part of their official duties; on a worldwide, perpetual, irrevocable, royalty-free basis to BMJ Publishing Group Ltd ("BMJ") its licensees and where the relevant Journal is co-owned by BMJ to the co-owners of the Journal, to publish the Work in this journal and any other BMJ products and to exploit all rights, as set out in our [licence](#).

The Submitting Author accepts and understands that any supply made under these terms is made by BMJ to the Submitting Author unless you are acting as an employee on behalf of your employer or a postgraduate student of an affiliated institution which is paying any applicable article publishing charge ("APC") for Open Access articles. Where the Submitting Author wishes to make the Work available on an Open Access basis (and intends to pay the relevant APC), the terms of reuse of such Open Access shall be governed by a Creative Commons licence – details of these licences and which [Creative Commons](#) licence will apply to this Work are set out in our licence referred to above.

Other than as permitted in any relevant BMJ Author's Self Archiving Policies, I confirm this Work has not been accepted for publication elsewhere, is not being considered for publication elsewhere and does not duplicate material already published. I confirm all authors consent to publication of this Work and authorise the granting of this licence.

1  
2  
3 **Impact of Structural Ageism on Greater Violence Against Older Persons:**  
4  
5 **A Cross-National Study of 56 Countries**  
6  
7  
8  
9

10 E-Shien Chang, M.Phil, M.A.<sup>1\*</sup>, Joan K. Monin, Ph.D.<sup>1</sup>, Daniel Zelterman, Ph.D.<sup>2</sup>,

11  
12  
13  
14 Becca R. Levy, Ph.D.<sup>1,3</sup>  
15  
16  
17  
18  
19

20 <sup>1</sup>Department of Social and Behavioral Sciences, Yale School of Public Health, New Haven,  
21 Connecticut, United States of America  
22  
23

24 <sup>2</sup>Department of Biostatistics, Yale School of Public Health, New Haven, Connecticut, United  
25 States of America  
26  
27  
28

29 <sup>3</sup>Department of Psychology, Yale University, New Haven, Connecticut, United States of  
30 America  
31  
32  
33  
34  
35  
36  
37  
38  
39  
40

41 \*Please address correspondence to:

42 E-Shien Chang, MPhil., M.A.

43 Department of Social and Behavioral Sciences

44 Yale School of Public Health

45 60 College Street

46 New Haven, CT 06520-8034

47 E-mail: [E-Shien.Chang@yale.edu](mailto:E-Shien.Chang@yale.edu)  
48  
49  
50  
51  
52  
53  
54  
55  
56  
57

## Abstract

**Objective:** To determine the association between country-level structural ageism and prevalence of violence against older persons.

**Design:** Country-level ecological study.

**Setting:** Structural ageism data were drawn from the nationally-representative World Values Survey 2010-2014 (WVS), global databases from the World Health Organization (WHO), United Nations (UN), and the World Bank. Violence data were based on the Global Burden of Diseases Study 2017 (GBD).

**Participants:** Analysis of 56 countries that represented 63.1% of the world's aging population aged 60 and over across all six of WHO regions.

**Exposure:** Structural ageism, following established structural stigma measures, consisted of two components: (1) discriminatory national policies related to older persons' economic, social, civil, and political rights, based on the four core components of human rights protection in Madrid International Plan of Action on Aging; and (2) prejudicial social norms against older persons, measured by negative attitudes toward older persons in 56 national polls in WVS aggregated to country-level. These components were z scored and combined such that higher score indicated greater structural ageism.

**Main Outcomes and Measures:** Prevalence rates of violence per 100,000 persons aged 70 and over in each country was based on extensive epidemiological surveillance data, survey, clinical data, and insurance claims in GBD and compiled by the Institute of Health Metrics and Evaluation, University of Washington.

**Results:** There was a wide variation in levels of structural ageism across countries. As predicted, structural ageism was significantly associated with the prevalence rates of violence in

1  
2  
3 multivariate models ( $\beta = 205.7$ ,  $SE = 96.3$ ,  $P = .03$ ), after adjusting for relevant covariates.

4  
5 Sensitivity analyses supported the robustness of our findings. That is, structural ageism did not  
6  
7 predict other types of violence and other types of prejudice did not predict violence against older  
8  
9 persons.  
10

11  
12 **Conclusions:** This study provides the first evidence of the association between higher structural  
13  
14 ageism and greater violence against older persons across countries.  
15  
16  
17  
18  
19  
20  
21  
22  
23  
24  
25  
26  
27  
28  
29  
30  
31  
32  
33  
34  
35  
36  
37  
38  
39  
40  
41  
42  
43  
44  
45  
46  
47  
48  
49  
50  
51  
52  
53  
54  
55  
56  
57  
58  
59  
60

### Strengths and Limitations of this study

- The current study, which is based on 56 countries that represented 63.1% of the world's aging population aged 60 and over across all six of WHO regions, is one of the largest cross-national investigations on violence against older persons to date.
- The ecological analysis examines a previously unexplored link between structural ageism and violence against older persons.
- A strength of our investigation was it examined country-level structural ageism for the first time by combining social norms and laws; this methodologically-validated approach was informed by extensive scholarship on other types of structural stigma including of women and sexual minorities.
- The robustness of the structural ageism- violence linkage was supported by three additional sets of sensitivity analyses.
- The ecological design with country-level information could be strengthened by adding individual-level data.

## Introduction

Violence directed against older persons is a pervasive public health problem. Globally, prevalence of violence against older persons has increased significantly over the last two decades.<sup>1</sup> One in six older persons experiences elder abuse in the past year.<sup>2</sup> Older persons' safety may be particularly compromised during the current COVID-19 pandemic as they experience increased exposures to wide-spread age-based discrimination, social isolation with perpetrators, and reduced options for support.<sup>3</sup> The associated social, psychological, and financial stressors further present significant barriers for reporting and help-seeking.<sup>4</sup> To this end, the United Nations has called for improved protection for older persons' safety and well-being during this health crisis.<sup>5</sup>

Addressing violence against older persons require population-level solutions. The World Health Organization (WHO) and the Centers for Disease Control and Prevention (CDC) have strongly recommended the integration of a socio-ecological framework in violence prevention research and practice.<sup>6</sup> Based on this multi-level model, risk factors for violence against older persons operate across individual, relationship, community and societal levels of social ecology, that jointly place individuals at a higher risk of violence victimization and perpetration. However, the majority of research on violence against older persons pertain to individual factors.<sup>7</sup> Compounding this lack of evidence beyond individuals is the disproportionate focus on the deficits of victims that erroneously suggests victims are to be blamed.<sup>8</sup>

Societal-level risk factors in violence against older persons deserve more attention given that interventions could be most effective when context-changing strategies are in place.<sup>9</sup> This knowledge void may be owing to a few conceptual, measurement, and methodological challenges. While contexts shape interactions, existing theories have largely overlooked the

1  
2  
3 ways in which macro-level factors, such as policies and cultural norms specific to aging, may be  
4 linked to downstream individual behaviors. Additionally, cross-national comparisons are lacking  
5 in this line of research.<sup>7</sup> With data typically collected in a single country, participants' responses  
6 may be restricted by the particular cultural climate in that country, hence limiting the  
7 understanding of the role of societal determinants on violence victimization and perpetration  
8 across cultures.<sup>10</sup>

9  
10  
11  
12  
13  
14  
15  
16  
17 As the most widespread form of bias and prejudice,<sup>11,12</sup> ageism harms older persons'  
18 health simultaneously at both structural and individual levels. At the structural level, ageism is  
19 manifested in the forms of explicit and implicit policies, practices, or social norms that impose  
20 bias and discrimination against older persons. At the individual level, ageism is manifested by  
21 negative age stereotypes and negative self-perceptions of aging. As premised by the Stereotype  
22 Embodiment Theory (SET),<sup>13</sup> both levels are closely intertwined because individual-level  
23 ageism is assimilated by older persons from surrounding cultures that propagate structural  
24 ageism. A recent systematic review based on 7 million older participants across 25 years found  
25 evidence the injurious health effects of structural ageism existed across country borders, but none  
26 of the studies included examined violence against older persons as its health outcome.<sup>14</sup>

27  
28  
29  
30  
31  
32  
33  
34  
35  
36  
37  
38  
39  
40 There are strong theoretical and empirical evidence from parallel tracks of stigma and  
41 violence research against women and sexual minorities to suggest the potential link between  
42 structural ageism and violence against older persons.<sup>15</sup> As suggested by SET, a plausible  
43 psychological pathway may be that ageism operating at the structural level could trickle down to  
44 shape individuals' negative age beliefs, which in turn affect behavioral outcomes.<sup>13</sup>  
45  
46  
47  
48  
49  
50  
51 Additionally, one might postulate that in social contexts that denigrate a group, individuals tend  
52 to be more accepting of violence toward that group. For instance, research in family violence  
53  
54  
55  
56  
57  
58  
59  
60

1  
2  
3 has found that cultures with greater sexism exhibited higher tolerance of intimate partner  
4  
5 violence.<sup>16,17</sup>  
6

7  
8 Last, considering structural ageism embodies a sociopolitical climate that disempower  
9  
10 older persons, the embedded hierarchical power relations may also leave older persons with less  
11  
12 resources to protect themselves from violence and its associated risk factors. However, until  
13  
14 now, the assumed link between structural ageism and violence had not been tested.<sup>18,19</sup>  
15  
16

17 In this present study, we predicted that structural ageism would be associated with  
18  
19 greater prevalence of violence against older persons, after adjusting for socioeconomic and  
20  
21 health risk factors.  
22  
23

## 24 **Methods**

### 25 **Data Sources**

26  
27 Data for our predictor, structural ageism, were drawn from the latest available wave of  
28  
29 World Values Survey (WVS) in 2010-2014 and global health databases including the World  
30  
31 Health Organization (WHO) and United Nations (UN). The WVS consists of nationally  
32  
33 representative polls of individuals' attitudes and behaviors since 1981.<sup>20</sup> Outcome data on the  
34  
35 prevalence estimates of violence were drawn from the Global Burden of Disease Study (GBD) in  
36  
37 2017 compiled by the Institute of Health and Metrics Evaluation (IHME) at the University of  
38  
39 Washington.<sup>21</sup> Data sources for covariates included WHO and the World Bank. Countries that  
40  
41 had data for structural ageism measures and prevalence estimates for violence formed our final  
42  
43 analyses, which consisted of 56 countries representing 82,249 respondents in WVS.<sup>20</sup>  
44  
45 Together, these countries accounted for 63.1% of the global older population aged 60 years and  
46  
47 older, representing all six WHO regions.  
48  
49  
50  
51  
52

### 53 **Exposure: Structural Ageism**

54  
55  
56  
57  
58  
59  
60



1  
2  
3 To operationalize structural ageism, we followed a methodologically-validated approach  
4 informed by extensive scholarship on structural stigma, which includes discriminatory social  
5 policies and prejudicial social norms.<sup>22-24</sup> Discriminatory social policies referred to macro-level  
6 policies and practices that discriminate against or restrict the resources and opportunities for  
7 older persons. In order to match with prejudicial social norms that were measured between 2010  
8 to 2014 in the WVS, the presence of four policies between 2010 to 2014 selected for the present  
9 index reflected four core components of human rights protection in the Madrid International Plan  
10 of Action on Aging<sup>25</sup>, including economic, social, civil, and political rights.<sup>26</sup> As the most  
11 comprehensive international policy framework to address population aging,<sup>27</sup> the Madrid Plan  
12 strives to eliminate all forms of violence and discrimination against older persons.<sup>26</sup> In our  
13 index, the protection of economic rights was based on whether or not each country had enacted  
14 pension reform laws including raising retirement benefits of workers as initially reported by  
15 country, and then subsequently validated and reported by UN experts in UN's World Population  
16 Policies database.<sup>28</sup> The protection of social rights - or recognizing older persons as a social  
17 group deserving of their own rights, was assessed by coding the presence of national policies that  
18 included healthy aging as a priority policy. Each country self-reported whether or not they have  
19 developed laws to protect the well-being of their aging populations. Data were collected and  
20 compiled by United Nations Population Fund (UNFPA).<sup>29</sup> The protection of civil rights was  
21 based on the existence of employment non-discrimination policies for older workers, drawn from  
22 expert evaluation in the publicly available Employment Protection Legislation Database, UN's  
23 International Labor Organizations.<sup>30</sup> The protection of political rights was based on the  
24 existence of constitutional-level protection against age discrimination, reported by each country  
25 and compiled by UNFPA.<sup>29</sup>  
26  
27  
28  
29  
30  
31  
32  
33  
34  
35  
36  
37  
38  
39  
40  
41  
42  
43  
44  
45  
46  
47  
48  
49  
50  
51  
52  
53  
54  
55  
56  
57  
58  
59  
60

1  
2  
3 The absence or presence of each of these 4 policies were summed into a continuous  
4 variable, ranging from 0 to 4. Higher score indicated that a country had greater structural  
5 ageism, as indicated by fewer policies protecting older persons. Overall, 17.9% had one  
6 discriminatory policy, 42.9% had two discriminatory policies, 16.1% had all four indicators of  
7 discriminatory policies. Only one had zero (Spain) (see table 1 in the Supplement).  
8  
9

10  
11  
12 The second domain in our index pertains to societal-level prejudicial attitudes toward  
13 older persons that reflects overarching public opinions.<sup>24,31</sup> Participants in WVS were asked  
14 their level of agreement on “older persons are a burden on society.” Score ranged from 1 to 4,  
15 with high levels indicated higher level of burden. The mean value was aggregated at the  
16 country-level. Higher values indicate more prejudicial social norms against older persons. Mean  
17 (SD) was 1.8 (0.2) that ranged from 1.2 to 2.4. Overall, 45.0% of all countries reported above-  
18 average level of endorsement in this statement.  
19  
20  
21  
22  
23  
24  
25  
26  
27  
28  
29

30  
31 Following analytical procedures in creating structural stigma indices,<sup>32,33</sup> we standardized  
32 the scores for each of the two domains separately, and then summed up both z-transformed score  
33 to create the structural ageism index. Given the values ranged from negative to positive in  
34 standardized scores, to ease interpretation, we added the positive value of the lowest negative  
35 value across all scores, so that the final scores would be equal or larger than 0. A separate factor  
36 analysis showed that both domains loaded on the same factor (eigenvalues>1.0; factor  
37 loading= .74), suggesting one underlying latent factor supporting the composite structural ageism  
38 index.  
39  
40  
41  
42  
43  
44  
45  
46  
47  
48

49 Structural ageism was examined as a continuous variable in the bivariate and  
50 multivariable models. As a secondary analysis to quantify risk levels of structural ageism in  
51  
52  
53  
54  
55  
56  
57

1  
2  
3 relation to prevalence of violence, we operationalized structural ageism as a categorical variable  
4 based on tertiles of final scores (i.e., low-, medium-, and high-level of structural ageism).  
5  
6

### 7 **Outcome: Prevalence Estimates of Violence against Older Persons**

8  
9  
10 We obtained prevalence estimates of violence from the Global Burden of Disease Study  
11 (GBD), one of the most comprehensive cross-national epidemiological studies on injuries,  
12 morbidities, and mortality based on extensive survey, epidemiological surveillance, and clinical  
13 data sources.<sup>21</sup> Recent reiteration of GBD was conducted by the Institute for Health Metrics and  
14 Evaluation (IHME) at the University of Washington using Bayesian meta-regression model to  
15 estimate rates of prevalence for each health and injury domain. In 2017, GBD was based on  
16 68,781 data sources used for the analysis of nonfatal causes of disease and injury for a total of  
17 354 causes.<sup>21</sup> Estimates were presented for those 70 and over which we used within each of the  
18 56 countries. GBD defined interpersonal violence according to the International Classification  
19 of Diseases (ICD)-10 (X85-Y08.9, Y87.1)<sup>34</sup> that covered three categories: (1) physical assault by  
20 any means, including firearm, bodily force, sharp or blunt objects, (2) sexual assault by bodily  
21 force, and (3) mistreatment, neglect, and abandonment, including physical abuse, sexual abuse,  
22 torture and cruelty. The prevalence of violence victimization used in this study was prevalence  
23 rate of both fatal and non-fatal violence victimization per 100,000 persons in the age group of 70  
24 years and over that covered all three categories of interpersonal violence. Although not yet  
25 applied to violence against older persons, prevalence estimates of violence drawn from GBD  
26 have been applied in systematic cross-national analysis of other forms of violence including  
27 intimate partner violence and suicides.<sup>35</sup>  
28  
29  
30  
31  
32  
33  
34  
35  
36  
37  
38  
39  
40  
41  
42  
43  
44  
45  
46  
47  
48  
49  
50

### 51 **Country-level Covariates**

1  
2  
3 We considered a wide range of socio-demographic and health variables as potential  
4 covariates a priori, owing to their known relationships with violence.<sup>15,36-40</sup> The pool of  
5 potential covariates, assessed in 2010 to match with the timing of the predictor, included (1)  
6 population ratio, measured by the proportion of the population 70 years and older relative to that  
7 of the younger-age population (20-69), (2) gross national income (GNI) per capita (in 1,000  
8 international dollar increments), (3) average years of schooling, (4) unemployment rate, and (5)  
9 alcohol consumption per capita. These covariates were available for all of the 56 countries.

10  
11  
12 To maintain study power and create the most parsimonious model, final covariates were  
13 selected based on the backward elimination strategy with the significant level set at  $p < .10$ . We  
14 performed a backward selection stepwise regression model in accordance with the Akaike  
15 Information Criterion (AIC), a measure of model deviance adjusted for the parameters in the  
16 model.<sup>41</sup> This approach with stepwise regression models was commonly applied in previous  
17 country-level ecological studies of violence with relatively smaller sample sizes.<sup>42,43</sup> Based on  
18 this variable selection procedure, three covariates were selected and thus  
19 retained in the final multivariable model: population ratio, GNI per capita, and alcohol  
20 consumption per capita.

### 21 22 23 24 25 26 27 28 29 30 31 32 33 34 35 36 37 38 39 40 **Statistical Analysis**

41  
42 Pearson correlation coefficients were used to examine the association between structural  
43 ageism, violence prevalence estimates, and covariates. Bivariate and multivariable linear  
44 regression models were used to estimate the relationship between structural ageism and  
45 prevalence rates of violence. Goodness of fit of the models to the data was evaluated using AIC.  
46 We used residual plots and multi-collinearity diagnostics to examine issues of heteroscedasticity  
47  
48  
49  
50  
51  
52  
53  
54  
55  
56  
57  
58  
59  
60

1  
2  
3 and multi-collinearity. To evaluate potential outliers in the model, we examined whether any  
4 observations was more than one Cook's distance.<sup>44</sup>  
5  
6

7  
8 To examine the robustness of the findings, we conducted several additional sensitivity  
9 analyses. First, to examine the discriminant validity of the structural ageism index, analyses of  
10 were performed replacing the prevalence rates of violence in older age groups with the estimates  
11 of violence in children in the forms of violent disciplines and peer violence. We hypothesize that  
12 structural ageism would not be related to estimates of violence in children. Data were drawn  
13 from nationally representative surveys in the UNICEF global databases.<sup>45</sup> Violent discipline by  
14 caregivers included psychological aggression, physical, and corporal punishment, as measured  
15 by the Parent-Child Conflict Tactics Scale.<sup>46</sup> Peer-violence was measured by the proportion of  
16 students aged 13-15 years who reported being bullied on one or more days in the past 30 days.  
17 The number of countries that had available estimates of violent discipline and peer violence  
18 during years of 2014-2017 that matched with participating countries in WVS were 19, and 21,  
19 respectively.  
20  
21  
22  
23  
24  
25  
26  
27  
28  
29  
30  
31  
32  
33  
34

35 The second sensitivity analysis examined the predictive validity of the structural ageism  
36 index by assessing the relationship between anti-immigrant, racial prejudice and prevalence  
37 estimates interpersonal violence in older age. We hypothesize that anti-immigrant and racial  
38 prejudice attitudes would not be related to interpersonal violence in older age. Anti-immigrant  
39 and racial prejudice attitudes were drawn from the WVS. Participants were asked to state which  
40 groups they would not like to have as neighbors: "People of another race," or  
41 "Immigrants/foreign workers." This measure has been used to assess negative attitudes toward  
42 minority group members.<sup>47,48</sup>  
43  
44  
45  
46  
47  
48  
49  
50  
51  
52  
53  
54  
55  
56  
57  
58  
59  
60

1  
2  
3 The third sensitivity analysis examined whether the effects of structural ageism on  
4 violence prevalence estimates were only specific to older age groups, but not younger age  
5 groups. Based on GBD 2017, we obtained prevalence rates of violence in age 15 to 49 years old.  
6  
7

8  
9  
10 All analyses were conducted in SAS (version 9.4, SAS Institute Inc., Cary, NC). This  
11 study was exempted by Yale University's Institutional Review Board (IRB2000027318).  
12  
13

### 14 **Patient and public involvement**

15  
16 Neither patients nor the public were involved in this research.  
17  
18

### 19 **Results**

20  
21 As predicted, structural ageism was significantly associated with higher prevalence of  
22 violence against older persons. This was found in both bivariate ( $\beta = 261.0$ ,  $SE = 106.0$ ,  $P = .02$ ).  
23 and multivariable models ( $\beta = 205.7$ ,  $SE = 96.3$ ,  $P = .03$ ). After controlling for covariates, a one  
24 standard deviation increase in the structural ageism index was associated with a 205.7 per  
25 100,000 persons increase in the prevalence of violence against older persons aged 70 years and  
26 older. Also as predicted, in a secondary analysis that included the categorization of the low-,  
27 medium-, and high- structural ageism predictor, there was a linear pattern between increasing  
28 levels of ageism and higher prevalence rates of violence, after adjusting for covariates (test for  
29 linear trend:  $P = .02$ ) (figure 1).  
30  
31  
32  
33  
34  
35  
36  
37  
38  
39  
40  
41

42 With respect to model diagnostics, collinearity tests indicated no evidence of  
43 multicollinearity.<sup>49</sup> Residual plots confirmed the model assumptions (normality and  
44 homoscedasticity of residuals) were met. All but two cases (China and Qatar) had a larger than  
45 Cook's Distance cut-off of one for outliers. When we removed China and Qatar respectively  
46 from the multivariable model estimates, the positive association between structural ageism and  
47 prevalence remained significant.  
48  
49  
50  
51  
52  
53  
54  
55  
56  
57  
58  
59  
60

1  
2  
3 Our results showed wide variation in levels of structural ageism across countries, with  
4 higher value indicating greater structural ageism (total values ranged from 0 to 7.3) (table 1).  
5  
6 Nigeria, Lebanon, and Belarus reported highest structural ageism. Uzbekistan, Cyprus, and  
7  
8 Spain had the lowest structural ageism. China, Russia, and Zimbabwe had the highest  
9  
10 prevalence rates of violence against older persons; whereas Singapore, Germany, and Egypt had  
11  
12 the lowest prevalence rates of violence against older persons. In support of this index, the scoring  
13  
14 of structural ageism in this study significantly correlated with a recent parallel report that ranked  
15  
16 country-level ageism based on social indices of five domains, including economic, health,  
17  
18 employment, environment, and social participation, across 15 Organization for Economic  
19  
20 Corporation and Development (OECD) countries ( $R=0.59$ ,  $P=0.02$ ).<sup>50</sup>  
21  
22  
23  
24  
25

26 Results from three sensitivity analyses suggested the robustness of the results. First, in  
27  
28 support of the discriminant validity of structural ageism index, ageism was not correlated with  
29  
30 violent discipline ( $R=0.31$ ,  $P=.21$ ) or bullying ( $R=-0.13$ ,  $p=.59$ ). Second, in support of the  
31  
32 predictive validity of structural ageism index, anti-immigrant and racial prejudice were not  
33  
34 correlated with violence estimates against older persons ( $R= -0.18$ ,  $P=.20$ ;  $R= -0.17$ ,  $P=.20$ ;  
35  
36 respectively). Third, the relationship between structural ageism and violence was non-significant  
37  
38 in the younger age group of 15 to 49 years old, suggesting the validity of our findings.  
39  
40  
41

## 42 Discussion

43  
44 This study investigated a previously unexplored relationship between structural ageism  
45  
46 and violence against older persons. As predicted, we found that structural ageism is significantly  
47  
48 associated with prevalence rates of violence against persons aged 70 and over, after controlling  
49  
50 for known risk factors. Our findings suggest a comprehensive strategy for preventing violence  
51  
52 against older persons should include structural ageism.  
53  
54  
55  
56  
57

1  
2  
3 Public health research on improving support structures and societal-based solutions is  
4 needed to effectively prevent violence against older persons at a large scale, especially in times  
5 of unrest and relative instability. A recent CDC report estimated that the rate of nonfatal assaults  
6 against persons 60 years and older has risen by 53% between 2008 and 2016.<sup>51</sup> Additionally,  
7 recent reports have indicated increasing rates of interpersonal violence in family settings during  
8 the ongoing COVID-19 pandemic.<sup>52</sup> As psychological stressors continue to intensify during the  
9 ongoing pandemic as the consequences of self-quarantine, expanding structural-level program  
10 response to improve the safety of older persons would be essential.  
11  
12  
13  
14  
15  
16  
17  
18  
19  
20

21 A strength of our investigation was it examined country-level structural ageism  
22 combining social laws and norms. The wide variation in country-level attitudes toward older  
23 persons was in line with previous cross-cultural analyses.<sup>53,54</sup> In the domain of policies, we also  
24 found variation in the level of each country's protection toward older persons. This may be a  
25 reflection of the gap in existing legal provisions and international conventions specifically  
26 supporting the rights of older persons.<sup>55</sup>  
27  
28  
29  
30  
31  
32  
33  
34

35 Congruent with intersectional theories,<sup>56</sup> our findings showed that countries reported  
36 higher structural ageism coincided with those that also reported greater inequality in other realms  
37 of stigma. For instance, Nigeria ranked among the highest in structural ageism in this study as  
38 well as highest in structural stigma against sexual minorities in a recent cross-cultural study of  
39 197 countries.<sup>57</sup> The opposite estimate was found in Spain where it ranked among the lowest in  
40 both structural stigma measures. Parallel scholarship in gender-based stigma also recently found  
41 that women residing in countries with greater structural-level gender-based stigma were more  
42 likely to experience violence.<sup>58</sup> Indeed, both older age and female gender could be potential  
43 modifying factors in the association between ageism and violence. As structural systems of  
44  
45  
46  
47  
48  
49  
50  
51  
52  
53  
54  
55  
56  
57  
58  
59  
60



1  
2  
3 oppression are often mutually manifested to reinforce health inequalities, analyses that only  
4 focus on gender, race, ethnicity alone are insufficient to understand population-level health  
5 disparities.<sup>59</sup> Future multi-level analyses that combine both population level and individual level  
6 data may assist in addressing the examination of these intersectional axes between older age, sex,  
7 and structural stigma in predicting violence.  
8  
9  
10  
11  
12  
13

14 Integrating structural ageism as a societal-level risk factor in existing elder abuse research  
15 may also help inject a multi-systemic, socio-cultural lens in developing much-needed  
16 interventions.<sup>60</sup> Theories of elder abuse have been predominantly interpersonal in nature, where  
17 victims of abuse were typically described as uniformly dependent and powerless.<sup>61-63</sup> The  
18 emphasis on older persons' vulnerabilities is not only a form of victim-blaming, but also shifts  
19 our attention away from the broader status inequality that each individual is embedded in.  
20 Considering the ways in which structural ageism seep through social interactions and its  
21 downstream consequences in shaping the inherent power imbalance between victims,  
22 perpetrators, and their environments can offer promising opportunities for primary prevention  
23 strategies.<sup>64</sup>  
24  
25  
26  
27  
28  
29  
30  
31  
32  
33  
34  
35  
36  
37

38 Our findings have a few limitations that point to future research directions. First, given  
39 that violence in general and elder abuse in particular is stigmatizing and illegal in most of the  
40 countries, it is possible that the violence against older person was under-reported. Second, the  
41 current ecological study design did not allow us to produce casual inference between structural  
42 ageism and violence against older persons. However, there are two reasons that we consider it  
43 likely that greater structural ageism led to greater risk of violence. First, it does not seem likely  
44 that the reverse of a diagnostic health outcome would influence a structural-level variable.  
45 Second, to ascertain temporal association, our structural ageism variable was based on estimates  
46  
47  
48  
49  
50  
51  
52  
53  
54  
55  
56  
57  
58  
59  
60

1  
2  
3 in 2010-2014, that predated violence prevalence outcome in 2017. Last, although we used global  
4 data with consistent definitions that allows for cross-national comparisons, the aggregate data  
5 structure would not permit individual-level interpretation. Future investigations should further  
6 assess whether the observed structural ageism-violence linkage extends to the individual level.  
7  
8  
9  
10  
11

12 As one of the largest cross-country studies on violence against older persons to date, this  
13 study also has a number of methodological strengths including: mitigating data variability for  
14 cross-country violence prevalence estimates with various data processing and estimation  
15 techniques as employed by GBD study investigators<sup>21</sup>; following strict definition of  
16 interpersonal violence guided by ICD diagnostic codes; and developing and implementing the  
17 first structural ageism measure combining social norms and laws.  
18  
19  
20  
21  
22  
23  
24  
25

26 Our findings hold important implications for violence prevention programming. First,  
27 ageism that operates at both individual and structural level deserves more consideration in  
28 estimating the occurrence of violence and abuse in older persons. Second, social and legal  
29 policies are inherently public health policies.<sup>65</sup> Social policies that protect the rights of older  
30 persons may reap significant public health benefits for population-level violence preventions.  
31 Third, as existing approaches for violence preventions are tailored toward individual ecology,  
32 positioning structural ageism as a societal risk factor of violence against older persons may help  
33 catalyze a paradigm shift in refining current primary preventions against violence and abuse.  
34 Such structural approach may focus on reducing ageism through improving political-legal,  
35 economic, as well as intergenerational support for older persons.<sup>66</sup> Other ways that policy makers  
36 and public health officials can mitigate effects of structural ageism could be by establishing  
37 societal-wide campaigns that promote older persons' rights and enhance diverse representation  
38 of aging through social media.<sup>67</sup>  
39  
40  
41  
42  
43  
44  
45  
46  
47  
48  
49  
50  
51  
52  
53  
54  
55  
56  
57  
58  
59  
60

## Conclusion

Our results suggest that structural ageism is a social determinant of elder abuse. Public health and population-based violence prevention policies may benefit from a targeted approach that tackles the harmful effects of structural ageism.

For peer review only

### **Contributors**

EC was involved in study conceptualization and design, data collection, analyses, interpretation of results and manuscript writing. JM and DZ contributed to study design, analyses and manuscript writing. BL contributed to study conceptualization and design, supervised analyses, and contributed to interpretation of results and manuscript writing.

### **Competing Interests**

None

### **Funding Statement**

This study was supported by the Samuel and Liselotte Herman Fellowship, Yale School of Public Health to the first author, National Institute on Aging grants to the second author (R01AG058565, R21AG055861-01A1), National Institutes on Health grants to the third author (P50-CA196530, P30-CA16359, R01-CA177719, R01-ES005775, R41-A120546, U48-DP005023, R01-CA168733), and a National Institute on Aging grant (U01AG032284) to the senior author.

### **Ethics Approval**

This study was exempted by Yale University's Institutional Review Board (IRB2000027318).

### **Data Sharing Agreement**

Data relevant to the study are included in the article or uploaded as supplementary information

1  
2  
3  
4  
5  
6  
7  
8  
9  
10  
11  
12  
13  
14  
15  
16  
17  
18  
19  
20  
21  
22  
23  
24  
25  
26  
27  
28  
29  
30  
31  
32  
33  
34  
35  
36  
37  
38  
39  
40  
41  
42  
43  
44  
45  
46  
47  
48  
49  
50  
51  
52  
53  
54  
55  
56  
57  
58  
59  
60

**Figure 1. Higher structural ageism is associated with greater prevalence rates of violence against older persons.**

For peer review only

## Reference List

1. World Health Organization. *Global status report on violence prevention*. Geneva, Switzerland: World Health Organization,;2014.
2. Yon Y, Mikton CR, Gassoumis ZD, Wilber KH. Elder abuse prevalence in community settings: a systematic review and meta-analysis. *Lancet Glob Health*. 2017;5(2):e147-e156.
3. Chang ES, Levy BR. High Prevalence of Elder Abuse During the COVID-19 Pandemic: Risk and Resilience Factors. *Am J Geriatr Psychiatry*. 2021.
4. Elman A, Breckman R, Clark S, et al. Effects of the COVID-19 Outbreak on Elder Mistreatment and Response in New York City: Initial Lessons. *J Appl Gerontol*. 2020:733464820924853.
5. United Nations. “Unacceptable” – UN expert urges better protection of older persons facing the highest risk of the COVID-19 pandemic. Geneva, Switzerland2020.
6. Dahlberg LK, EG.; Violence-a global public health problem. In: Krug ED, LL.; Mercy, JA.;, ed. *World Report on Violence and Health*. Geneva, Switzerland,: World Health Organization 2002:1-56.
7. Pillemer K, Burnes D, Riffin C, Lachs MS. Elder abuse: Global situation, risk factors, and prevention strategies. *Gerontologist*. 2016;56 Suppl 2:S194-205.
8. Liu PJ, Conrad KJ, Beach SR, Iris M, Schiamberg LB. The Importance of Investigating Abuser Characteristics in Elder Emotional/Psychological Abuse: Results from Adult Protective Services Data. *J Gerontol B Psychol Sci Soc Sci*. 2017.
9. Frieden TR. A framework for public health action: the health impact pyramid. *Am J Public Health*. 2010;100(4):590-595.
10. Pachankis JE, Branstrom R. Hidden from happiness: Structural stigma, sexual orientation concealment, and life satisfaction across 28 countries. *J Consult Clin Psychol*. 2018;86(5):403-415.
11. Levy BR, Slade MD, Chang ES, Kanno S, Wang SY. Ageism amplifies cost and prevalence of health conditions. *Gerontologist*. 2018.
12. Nelson TD. *Ageism: Stereotyping and prejudice against older persons*. Cambridge, MA: Massachusetts Institute of Technology; 2002.
13. Levy B. Stereotype Embodiment: A Psychosocial Approach to Aging. *Curr Dir Psychol Sci*. 2009;18(6):332-336.
14. Chang ES, Kanno S, Levy S, Wang SY, Lee JE, Levy BR. Global reach of ageism on older persons' health: A systematic review. *PLoS One*. 2020;15(1):e0220857.
15. Wilkins N, Tsao B, Hertz M, Davis R, Klevens J. *Connecting the dots: An overview of the links among multiple forms of violence*. Oakland CA: National Center for Injury Prevention and Control;2014.
16. Reichl AJ, Ali JI, Uyeda K. Latent Sexism in Print Ads Increases Acceptance of Sexual Assault. *SAGE Open*. 2018;8(2):2158244018769755.
17. Ward M. Media and sexualization: State of empirical research, 1995–2015. *Journal of Sex Research*. 2016;53(4-5):560-577.
18. Kosber J, Nahmiash D. Characteristics of Victims and Perpetrators and Milieus of Abuse and Neglect. In: Baumhover L, Beall S, eds. *Abuse, Neglect, and Exploitation of Older Persons: Strategies for Assessment and Intervention*. Baltimore: Health Professions Press; 1996.

19. McDonald L. Ageism and elder mistreatment: Talking the talk but not walking the walk. In: Nelson TD, ed. *Ageism: Stereotyping and Prejudice against Older Persons*. Cambridge: MIT; 2017.
20. Inglehart R, Haerpfer C, Moreno C, et al. *World Values Survey: Round six - Country-pooled datafile version*. Madrid: JD Systems Institute;2014.
21. Global, regional, and national incidence, prevalence, and years lived with disability for 354 diseases and injuries for 195 countries and territories, 1990-2017: a systematic analysis for the Global Burden of Disease Study 2017. *Lancet*. 2018;392(10159):1789-1858.
22. Hatzenbuehler ML. Structural stigma and health inequalities: Research evidence and implications for psychological science. *Am Psychol*. 2016;71(8).
23. Hatzenbuehler ML, Phelan JC, Link BG. Stigma as a fundamental cause of population health inequalities. *Am J Public Health*. 2013;103(5):813-821.
24. Pachankis JE, Hatzenbuehler ML, Hickson F, et al. Hidden from health: structural stigma, sexual orientation concealment, and HIV across 38 countries in the European MSM Internet Survey. *AIDS*. 2015;29(10):1239-1246.
25. United Nations Development Programme. *Implementing the Madrid Plan of Action on Ageing: What have we learned? And, where do we go from here?* 2018.
26. United Nations. *Political declaration and Madrid International Plan of Action on Ageing*. New York2002.
27. Sidorenko A. Implmentation of the Madrid International Plan of Action on Aging: Research dimension. *Geriatrics and Gerontology International*. 2004;4:S87-S89.
28. United Nations. *World population policies 2013*. 2013.
29. United Nations Population Fund, HelpAge International. *Overview of available policies and legislation, data and research, and insitutional arrangements relating to older persons- Progress since Madrid*. New York2012.
30. International Labor Organization. *Employment Protection Legislation Database ILO EPLex Online Database*.
31. Evans-Lacko S, Brohan E, Mojtabai R, Thornicroft G. Association between public views of mental illness and self-stigma among individuals with mental illness in 14 European countries. *Psychol Med*. 2012;42(8):1741-1752.
32. Hatzenbuehler ML, Jun H-J, Corliss HL, Austin SB. Structural stigma and cigarette smoking in a prospective cohort study of sexual minority and heterosexual youth. *Ann Behav Med*. 2014;47(1):48-56.
33. Hatzenbuehler ML. The social environment and suicide attempts in lesbian, gay, and bisexual youth. *Pediatrics*. 2011;127(5):896-903.
34. World Health Organization. *The ICD-10 classification of mental and behavioural disorders: Clinical descriptions and diagnostic guidelines*. Geneva, Switzerland: World Health Organization,;1992.
35. Naghavi M. Global, regional, and national burden of suicide mortality 1990 to 2016: systematic analysis for the Global Burden of Disease Study 2016. *BMJ*. 2019;364:194.
36. North MS, Fiske ST. Modern Attitudes Toward Older Adults in the Aging World: A Cross-Cultural Meta-Analysis. *Psychological bulletin*. 2015;141(5):993-1021.
37. Renno Santos M, Testa A, Porter LC, Lynch JP. The contribution of age structure to the international homicide decline. *PLoS One*. 2019;14(10):e0222996.

- 1
- 2
- 3 38. Marques S, Marriano J, Mendonca J, et al. Determinants of ageism against older adults:  
4 A systematic review of quantitative evidence. 2019.
- 5 39. Wolf A, Gray R, Fazel S. Violence as a public health problem: an ecological study of 169  
6 countries. *Soc Sci Med*. 2014;104(100):220-227.
- 7
- 8 40. Krug EG, Mercy JA, Dahlberg LL, Zwi AB. The world report on violence and health.  
9 *Lancet (London, England)*. 2002;360(9339):1083-1088.
- 10 41. Aho K, Derryberry D, Peterson T. Model selection for ecologists: the worldviews of AIC  
11 and BIC. *Ecology*. 2014;95(3):631-636.
- 12 42. Sardinha L, Nájera Catalán HE. Attitudes towards domestic violence in 49 low- and  
13 middle-income countries: A gendered analysis of prevalence and country-level correlates.  
14 *PLoS One*. 2018;13(10):e0206101-e0206101.
- 15 43. Elgar FJ, Donnelly PD, Michaelson V, et al. Corporal punishment bans and physical  
16 fighting in adolescents: an ecological study of 88 countries. *BMJ Open*.  
17 2018;8(9):e021616.
- 18 44. Cook D, Weisberg S. *Residuals and influence in regression*. New York, NY: Chapman  
19 & Hall; 1982.
- 20 45. UNICEF Databases. *Violent discipline*. UN2020.
- 21 46. Straus MA, Hamby SL, Finkelhor D, Moore DW, Runyan D. Identification of child  
22 maltreatment with the Parent-Child Conflict Tactics Scales: development and  
23 psychometric data for a national sample of American parents. *Child abuse & neglect*.  
24 1998;22(4):249-270.
- 25 47. Haney JL. Predictors of Homonegativity in the United States and the Netherlands Using  
26 the Fifth Wave of the World Values Survey. *J Homosex*. 2016;63(10):1355-1377.
- 27 48. Ceobanu A, Escandell X. Comparative analyses of public attitudes toward immigrants  
28 and immigration using multinational survey data: A review of theories and research.  
29 *Annual review of sociology*. 2010;36.
- 30 49. Aiken L, West S. *Multiple regression: Testing and interpreting interactions*. Newbury  
31 Park: Sage Publications; 1991.
- 32 50. Kim JH, Song A, Chung S, Kwak KB, Lee Y. The Comparative Macro-Level Ageism  
33 Index: An International Comparison. *J Aging Soc Policy*. 2020:1-14.
- 34 51. Logan J, Haileyesus T, Ertl A, Rostad W, Herbst J. Nonfatal assaults and homicides  
35 among adults aged  $\geq 60$  years — United States, 2002–2016. *MMWR Morb Mortal Wkly*  
36 *Rep*. 2019;68:297-302.
- 37 52. Peterman A, Potts A, O'Donnell M, Thompson K, Shah N, Oertelt-Prigione S. *Pandemics*  
38 *and violence against women and children*. Washington, DC: Center for Global  
39 Development; 2020.
- 40 53. Nash P, Officer A, de la Fuente-Nunez V, Schneiders M, Thiyagarajan J. Global trends in  
41 ageist disposition: comparing low, middle, and high income countries using the World  
42 Values Survey wave 6. *Innovation in Aging*. 2018;2:34.
- 43 54. Nash P, Schneiders M, Officer A, Jotheeswaran A. Respected or a burden: Global  
44 attitudes toward older people using the World Values Survey Wave 6. *Innovation in*  
45 *Aging*. 2017;1(S1):116.
- 46 55. Doron I, Apter I. The debate around the need for an international convention on the rights  
47 of older persons. *Gerontologist*. 2010;50(5):586-593.
- 48
- 49
- 50
- 51
- 52
- 53
- 54
- 55
- 56
- 57
- 58
- 59
- 60



- 1  
2  
3 56. Crenshaw K. Demarginalizing the intersection of race and sex: A black feminist critique  
4 of antidiscrimination doctrine, feminist theory and antiracist politics. *University of*  
5 *Chicago Legal Forum*. 1989;1989(1).  
6  
7 57. Pachankis JE, Branstrom R. How many sexual minorities are hidden? Projecting the size  
8 of the global closet with implications for policy and public health. *PLoS One*.  
9 2019;14(6):e0218084.  
10 58. Scheer JR, Pachankis JE, Bränström R. Gender-based Structural Stigma and Intimate  
11 Partner Violence Across 28 Countries: A Population-based Study of Women Across  
12 Sexual Orientation, Immigration Status, and Socioeconomic Status. *J Interpers Violence*.  
13 2020:886260520976212.  
14 59. Cole ER. Intersectionality and research in psychology. *Am Psychol*. 2009;64(3):170-180.  
15 60. Roberto KA, Teaster PB. Theorizing elder abuse. In: Dong X, ed. *Elder abuse*.  
16 Switzerland: Springer; 2017:21-44.  
17 61. Anetzberger GJ. An update on the nature and scope of elder abuse. *Generations*.  
18 2012(36):12-20.  
19 62. Wolf RS. Elder abuse: An introduction. *Generations*. 2000;20(4):301-305.  
20 63. Burnight KM, L.;. *Theoretical model development in elder mistreatment* 2011.  
21 64. Phelan A, Ayalon L. The intersection of ageism and elder abuse. *Advances in elder abuse*  
22 *research, international perspectives*. Switzerland: Springer; 2020:11-22.  
23 65. Philbin MM, Flake M, Hatzenbuehler ML, Hirsch JS. State-level immigration and  
24 immigrant-focused policies as drivers of Latino health disparities in the United States.  
25 *Soc Sci Med*. 2018;199:29-38.  
26 66. Ayalon L, Chasteen A, Diehl M, et al. Aging in Times of the COVID-19 Pandemic:  
27 Avoiding Ageism and Fostering Intergenerational Solidarity. *J Gerontol B Psychol Sci*  
28 *Soc Sci*. 2020.  
29 67. Levy BR. Age-stereotype paradox: Opportunity for social change. *Gerontologist*.  
30 2017;57(Suppl 2):S118-S126.  
31  
32  
33  
34  
35  
36  
37  
38  
39  
40  
41  
42  
43  
44  
45  
46  
47  
48  
49  
50  
51  
52  
53  
54  
55  
56  
57  
58  
59  
60

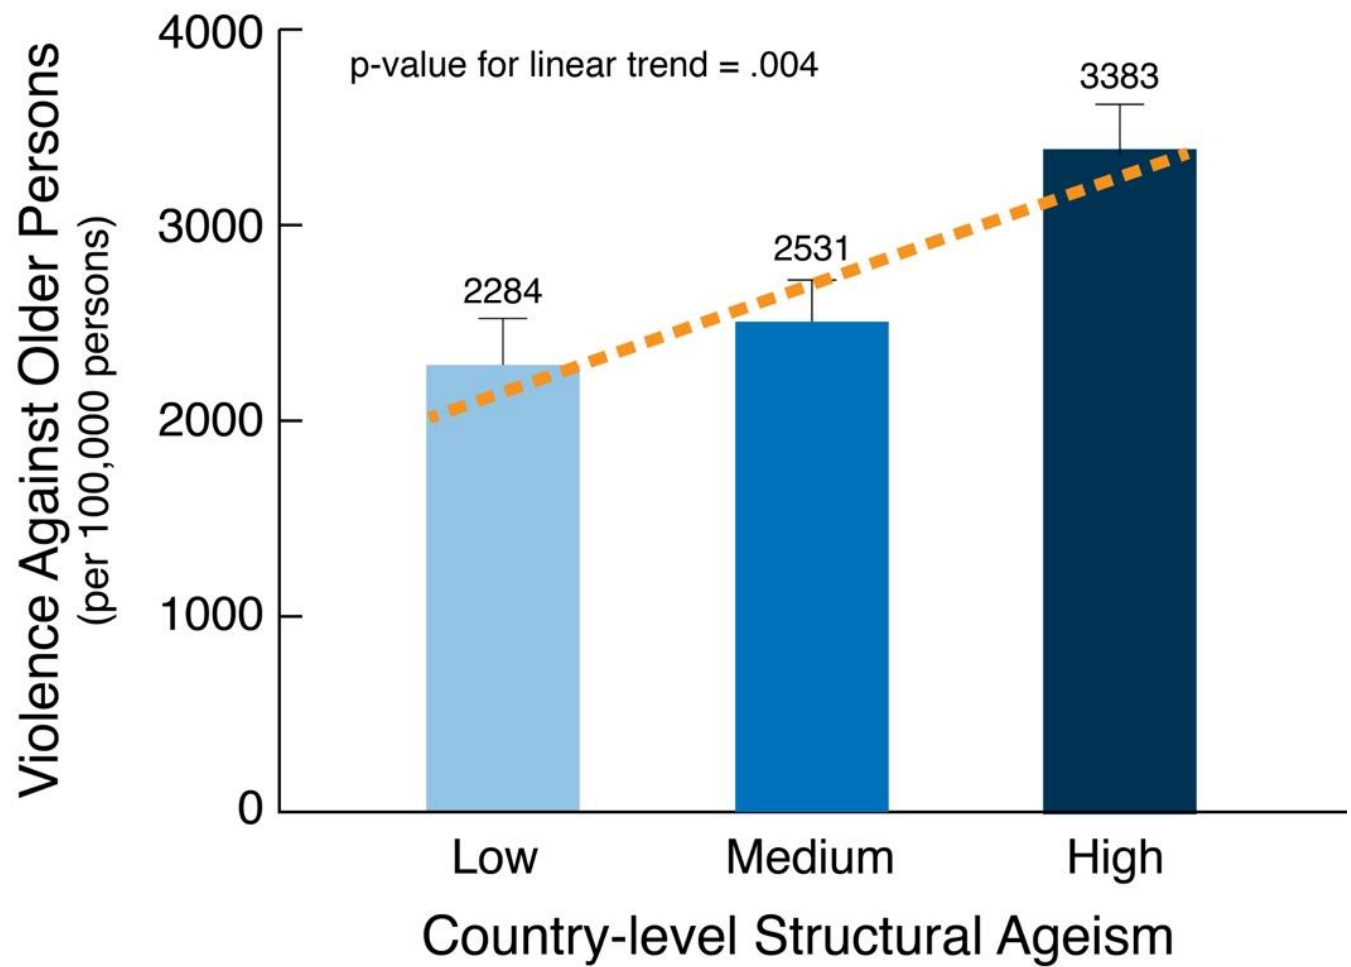

**Figure 1. Higher structural ageism is associated with greater prevalence rates of violence against older persons.**

eTable 1. Country-Level Structural Ageism and Prevalence Rates of Violence Against Older Persons in 56 countries

| Country         | Structural Ageism | Prevalence<br><i>Rates of violence per<br/>100,000 persons</i> | Country             | Structural Ageism | Prevalence<br><i>Rates of violence per<br/>100,000 persons</i> |
|-----------------|-------------------|----------------------------------------------------------------|---------------------|-------------------|----------------------------------------------------------------|
| Algeria         | 3.0               | 1516.0                                                         | Morocco             | 4.0               | 1466.7                                                         |
| Argentina       | 2.5               | 2939.6                                                         | Netherlands         | 1.3               | 1570.2                                                         |
| Armenia         | 2.1               | 2658.0                                                         | New Zealand         | 1.6               | 3340.4                                                         |
| Australia       | 2.1               | 2968.4                                                         | Nigeria             | 7.3               | 3605.2                                                         |
| Azerbaijan      | 1.4               | 3065.7                                                         | Pakistan            | 4.8               | 2370.4                                                         |
| Belarus         | 5.5               | 4348.2                                                         | Peru                | 3.2               | 1699.5                                                         |
| Brazil          | 2.0               | 2502.5                                                         | Philippines         | 4.3               | 4445.2                                                         |
| Chile           | 2.1               | 2575.1                                                         | Poland              | 3.3               | 2336.9                                                         |
| China           | 4.5               | 7109.6                                                         | Qatar               | 1.7               | 1729.5                                                         |
| Columbia        | 3.4               | 3316.0                                                         | Romania             | 4.3               | 2601.5                                                         |
| Cyprus          | 0.3               | 1783.4                                                         | Russia              | 3.1               | 5300.1                                                         |
| Ecuador         | 2.8               | 2534.2                                                         | Rwanda              | 5.3               | 4147.4                                                         |
| Egypt           | 3.6               | 1271.0                                                         | Singapore           | 3.9               | 1331.7                                                         |
| Estonia         | 3.5               | 4287.0                                                         | Slovenia            | 4.2               | 2639.6                                                         |
| Georgia         | 2.9               | 2233.8                                                         | South Africa        | 5.0               | 4481.1                                                         |
| Germany         | 2.7               | 1329.5                                                         | South Korea         | 2.5               | 1446.8                                                         |
| Ghana           | 5.4               | 2962.3                                                         | Spain               | 0.4               | 1554.4                                                         |
| Haiti           | 4.3               | 3558.5                                                         | Sweden              | 1.6               | 1913.8                                                         |
| Iraq            | 4.8               | 2009.2                                                         | Thailand            | 3.9               | 3312.5                                                         |
| Japan           | 1.6               | 1642.6                                                         | Trinidad and Tobago | 2.7               | 2723.7                                                         |
| Jordan          | 2.6               | 1738.3                                                         | Tunisia             | 4.3               | 1506.3                                                         |
| Kazakhstan      | 3.5               | 3238.2                                                         | Turkey              | 3.9               | 1747.6                                                         |
| Kuwait          | 4.1               | 1605.9                                                         | Ukraine             | 4.4               | 4647.7                                                         |
| Kyrgyz Republic | 3.0               | 2815.9                                                         | Uruguay             | 4.4               | 2818.6                                                         |
| Lebanon         | 7.2               | 1610.9                                                         | United States       | 2.6               | 4031.8                                                         |
| Libya           | 4.2               | 1501.1                                                         | Uzbekistan          | 0.0               | 2331.1                                                         |
| Malaysia        | 2.8               | 2805.2                                                         | Yemen               | 2.5               | 1392.6                                                         |
| Mexico          | 2.7               | 3404.4                                                         | Zimbabwe            | 4.2               | 5082.5                                                         |

## STROBE Statement—checklist of items that should be included in reports of observational studies

|                              | Item No | Recommendation                                                                                                                                                                                                                                                                                                                                                                                                                                                         | Page No |
|------------------------------|---------|------------------------------------------------------------------------------------------------------------------------------------------------------------------------------------------------------------------------------------------------------------------------------------------------------------------------------------------------------------------------------------------------------------------------------------------------------------------------|---------|
| <b>Title and abstract</b>    | 1       | (a) Indicate the study's design with a commonly used term in the title or the abstract                                                                                                                                                                                                                                                                                                                                                                                 | 2       |
|                              |         | (b) Provide in the abstract an informative and balanced summary of what was done and what was found                                                                                                                                                                                                                                                                                                                                                                    | 2-3     |
| <b>Introduction</b>          |         |                                                                                                                                                                                                                                                                                                                                                                                                                                                                        |         |
| Background/rationale         | 2       | Explain the scientific background and rationale for the investigation being reported                                                                                                                                                                                                                                                                                                                                                                                   | 5-6     |
| Objectives                   | 3       | State specific objectives, including any prespecified hypotheses                                                                                                                                                                                                                                                                                                                                                                                                       | 6       |
| <b>Methods</b>               |         |                                                                                                                                                                                                                                                                                                                                                                                                                                                                        |         |
| Study design                 | 4       | Present key elements of study design early in the paper                                                                                                                                                                                                                                                                                                                                                                                                                | 7       |
| Setting                      | 5       | Describe the setting, locations, and relevant dates, including periods of recruitment, exposure, follow-up, and data collection                                                                                                                                                                                                                                                                                                                                        | 7       |
| Participants                 | 6       | (a) <i>Cohort study</i> —Give the eligibility criteria, and the sources and methods of selection of participants. Describe methods of follow-up<br><i>Case-control study</i> —Give the eligibility criteria, and the sources and methods of case ascertainment and control selection. Give the rationale for the choice of cases and controls<br><i>Cross-sectional study</i> —Give the eligibility criteria, and the sources and methods of selection of participants | 7-11    |
|                              |         | (b) <i>Cohort study</i> —For matched studies, give matching criteria and number of exposed and unexposed<br><i>Case-control study</i> —For matched studies, give matching criteria and the number of controls per case                                                                                                                                                                                                                                                 | 7-11    |
| Variables                    | 7       | Clearly define all outcomes, exposures, predictors, potential confounders, and effect modifiers. Give diagnostic criteria, if applicable                                                                                                                                                                                                                                                                                                                               | 7-11    |
| Data sources/<br>measurement | 8*      | For each variable of interest, give sources of data and details of methods of assessment (measurement). Describe comparability of assessment methods if there is more than one group                                                                                                                                                                                                                                                                                   | 7-11    |
| Bias                         | 9       | Describe any efforts to address potential sources of bias                                                                                                                                                                                                                                                                                                                                                                                                              | 7-11    |
| Study size                   | 10      | Explain how the study size was arrived at                                                                                                                                                                                                                                                                                                                                                                                                                              | 7-11    |
| Quantitative variables       | 11      | Explain how quantitative variables were handled in the analyses. If applicable, describe which groupings were chosen and why                                                                                                                                                                                                                                                                                                                                           | 7-11    |
| Statistical methods          | 12      | (a) Describe all statistical methods, including those used to control for confounding                                                                                                                                                                                                                                                                                                                                                                                  | 10-11   |
|                              |         | (b) Describe any methods used to examine subgroups and interactions                                                                                                                                                                                                                                                                                                                                                                                                    | 10-11   |
|                              |         | (c) Explain how missing data were addressed                                                                                                                                                                                                                                                                                                                                                                                                                            | 10-11   |
|                              |         | (d) <i>Cohort study</i> —If applicable, explain how loss to follow-up was addressed<br><i>Case-control study</i> —If applicable, explain how matching of cases and controls was addressed<br><i>Cross-sectional study</i> —If applicable, describe analytical methods taking account of sampling strategy                                                                                                                                                              | 10-11   |

1  
2  
3  
4  
5  
6  
7  
8  
9  
10  
11  
12  
13  
14  
15  
16  
17  
18  
19  
20  
21  
22  
23  
24  
25  
26  
27  
28  
29  
30  
31  
32  
33  
34  
35  
36  
37  
38  
39  
40  
41  
42  
43  
44  
45  
46  
47  
48  
49  
50  
51  
52  
53  
54  
55  
56  
57  
58  
59  
60

(e) Describe any sensitivity analyses

10-  
11

Continued on next page

For peer review only

| <b>Results</b>           |     |                                                                                                                                                                                                              |       |
|--------------------------|-----|--------------------------------------------------------------------------------------------------------------------------------------------------------------------------------------------------------------|-------|
| Participants             | 13* | (a) Report numbers of individuals at each stage of study—eg numbers potentially eligible, examined for eligibility, confirmed eligible, included in the study, completing follow-up, and analysed            | 12    |
|                          |     | (b) Give reasons for non-participation at each stage                                                                                                                                                         | 12    |
|                          |     | (c) Consider use of a flow diagram                                                                                                                                                                           | 12    |
| Descriptive data         | 14* | (a) Give characteristics of study participants (eg demographic, clinical, social) and information on exposures and potential confounders                                                                     | 12-13 |
|                          |     | (b) Indicate number of participants with missing data for each variable of interest                                                                                                                          | 12-13 |
|                          |     | (c) <i>Cohort study</i> —Summarise follow-up time (eg, average and total amount)                                                                                                                             | N/A   |
| Outcome data             | 15* | <i>Cohort study</i> —Report numbers of outcome events or summary measures over time                                                                                                                          | N/A   |
|                          |     | <i>Case-control study</i> —Report numbers in each exposure category, or summary measures of exposure                                                                                                         | N/A   |
|                          |     | <i>Cross-sectional study</i> —Report numbers of outcome events or summary measures                                                                                                                           | 12-13 |
| Main results             | 16  | (a) Give unadjusted estimates and, if applicable, confounder-adjusted estimates and their precision (eg, 95% confidence interval). Make clear which confounders were adjusted for and why they were included | 12-13 |
|                          |     | (b) Report category boundaries when continuous variables were categorized                                                                                                                                    | 12-13 |
|                          |     | (c) If relevant, consider translating estimates of relative risk into absolute risk for a meaningful time period                                                                                             | 12-13 |
| Other analyses           | 17  | Report other analyses done—eg analyses of subgroups and interactions, and sensitivity analyses                                                                                                               | 12-13 |
| <b>Discussion</b>        |     |                                                                                                                                                                                                              |       |
| Key results              | 18  | Summarise key results with reference to study objectives                                                                                                                                                     | 13-14 |
| Limitations              | 19  | Discuss limitations of the study, taking into account sources of potential bias or imprecision. Discuss both direction and magnitude of any potential bias                                                   | 14-15 |
| Interpretation           | 20  | Give a cautious overall interpretation of results considering objectives, limitations, multiplicity of analyses, results from similar studies, and other relevant evidence                                   | 14-15 |
| Generalisability         | 21  | Discuss the generalisability (external validity) of the study results                                                                                                                                        | 14-15 |
| <b>Other information</b> |     |                                                                                                                                                                                                              |       |
| Funding                  | 22  | Give the source of funding and the role of the funders for the present study and, if applicable, for the original study on which the present article is based                                                | 17    |

\*Give information separately for cases and controls in case-control studies and, if applicable, for exposed and unexposed groups in cohort and cross-sectional studies.

**Note:** An Explanation and Elaboration article discusses each checklist item and gives methodological background and published examples of transparent reporting. The STROBE checklist is best used in conjunction with this article (freely available on the Web sites of PLoS Medicine at <http://www.plosmedicine.org/>, Annals of Internal Medicine at <http://www.annals.org/>, and Epidemiology at <http://www.epidem.com/>). Information on the STROBE Initiative is available at [www.strobe-statement.org](http://www.strobe-statement.org).
