# Supplementary material for: Impact of structural ageism on greater violence against older persons: a cross-national study of 56 countries
Source: PubMed Central journal article supplement — BMJ Open. 2021 May 13;11(5):e042580. doi: 10.1136/bmjopen-2020-042580 (PMC8126306; doi:10.1136/bmjopen-2020-042580), 2021-05-13
Supplement: bmjopen-2020-042580supp001.pdf [file bmjopen-2020-042580supp001.pdf]

**eTable 1. Country-Level Structural Ageism and Prevalence Rates of Violence Against Older Persons in 56 countries**

| <b>Country</b>  | <b>Structural Ageism</b> | <b>Prevalence</b><br><i>Rates of violence per 100,000 persons</i> | <b>Country</b>      | <b>Structural Ageism</b> | <b>Prevalence</b><br><i>Rates of violence per 100,000 persons</i> |
|-----------------|--------------------------|-------------------------------------------------------------------|---------------------|--------------------------|-------------------------------------------------------------------|
| Algeria         | 3.0                      | 1516.0                                                            | Morocco             | 4.0                      | 1466.7                                                            |
| Argentina       | 2.5                      | 2939.6                                                            | Netherlands         | 1.3                      | 1570.2                                                            |
| Armenia         | 2.1                      | 2658.0                                                            | New Zealand         | 1.6                      | 3340.4                                                            |
| Australia       | 2.1                      | 2968.4                                                            | Nigeria             | 7.3                      | 3605.2                                                            |
| Azerbaijan      | 1.4                      | 3065.7                                                            | Pakistan            | 4.8                      | 2370.4                                                            |
| Belarus         | 5.5                      | 4348.2                                                            | Peru                | 3.2                      | 1699.5                                                            |
| Brazil          | 2.0                      | 2502.5                                                            | Philippines         | 4.3                      | 4445.2                                                            |
| Chile           | 2.1                      | 2575.1                                                            | Poland              | 3.3                      | 2336.9                                                            |
| China           | 4.5                      | 7109.6                                                            | Qatar               | 1.7                      | 1729.5                                                            |
| Columbia        | 3.4                      | 3316.0                                                            | Romania             | 4.3                      | 2601.5                                                            |
| Cyprus          | 0.3                      | 1783.4                                                            | Russia              | 3.1                      | 5300.1                                                            |
| Ecuador         | 2.8                      | 2534.2                                                            | Rwanda              | 5.3                      | 4147.4                                                            |
| Egypt           | 3.6                      | 1271.0                                                            | Singapore           | 3.9                      | 1331.7                                                            |
| Estonia         | 3.5                      | 4287.0                                                            | Slovenia            | 4.2                      | 2639.6                                                            |
| Georgia         | 2.9                      | 2233.8                                                            | South Africa        | 5.0                      | 4481.1                                                            |
| Germany         | 2.7                      | 1329.5                                                            | South Korea         | 2.5                      | 1446.8                                                            |
| Ghana           | 5.4                      | 2962.3                                                            | Spain               | 0.4                      | 1554.4                                                            |
| Haiti           | 4.3                      | 3558.5                                                            | Sweden              | 1.6                      | 1913.8                                                            |
| Iraq            | 4.8                      | 2009.2                                                            | Thailand            | 3.9                      | 3312.5                                                            |
| Japan           | 1.6                      | 1642.6                                                            | Trinidad and Tobago | 2.7                      | 2723.7                                                            |
| Jordan          | 2.6                      | 1738.3                                                            | Tunisia             | 4.3                      | 1506.3                                                            |
| Kazakhstan      | 3.5                      | 3238.2                                                            | Turkey              | 3.9                      | 1747.6                                                            |
| Kuwait          | 4.1                      | 1605.9                                                            | Ukraine             | 4.4                      | 4647.7                                                            |
| Kyrgyz Republic | 3.0                      | 2815.9                                                            | Uruguay             | 4.4                      | 2818.6                                                            |
| Lebanon         | 7.2                      | 1610.9                                                            | United States       | 2.6                      | 4031.8                                                            |
| Libya           | 4.2                      | 1501.1                                                            | Uzbekistan          | 0.0                      | 2331.1                                                            |
| Malaysia        | 2.8                      | 2805.2                                                            | Yemen               | 2.5                      | 1392.6                                                            |
| Mexico          | 2.7                      | 3404.4                                                            | Zimbabwe            | 4.2                      | 5082.5                                                            |
